# Supplementary material for: Computational insights for predicting the binding and selectivity of peptidomimetic plasmepsin IV inhibitors against cathepsin D
Source: Royal Society of Chemistry journal article supplement (doi:10.1039/d2ra06246a), 2022-12-22
Supplement: d2ra06246a2.pdf [file d2ra06246a2.pdf]

## Computational Insights for Predicting the Binding and Selectivity of Peptidomimetic Plasmepsin IV Inhibitors against Cathepsin D

Lucas Sousa Martins<sup>1</sup>, Hendrik G. Kruger<sup>2</sup>, Tricia Naicker<sup>2</sup>, Cláudio N. Alves<sup>1</sup>, Jerônimo Lameira<sup>1</sup>, and José Rogério A. Silva<sup>1,\*</sup>

### Supplementary Material

Figure S1. RMSD plot for main-chain atoms in PlmIV systems.

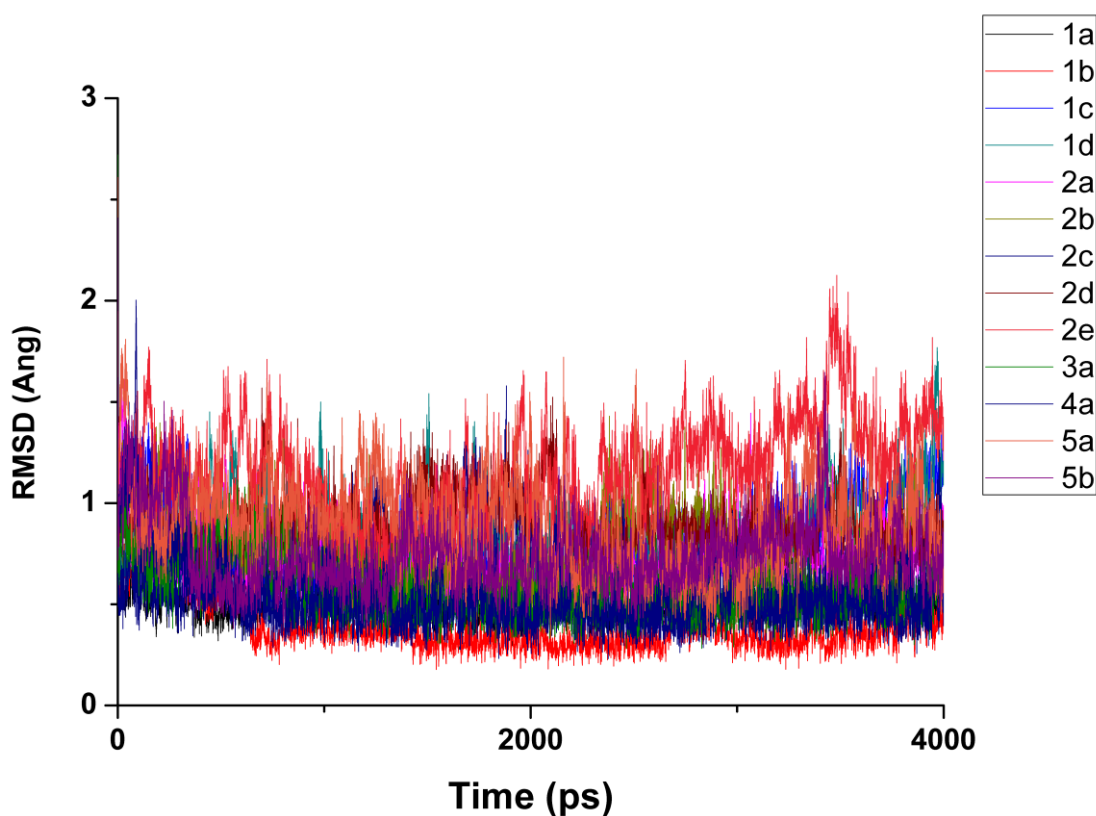

**Figure S2.** RMSD plot for main-chain atoms in CatD systems.

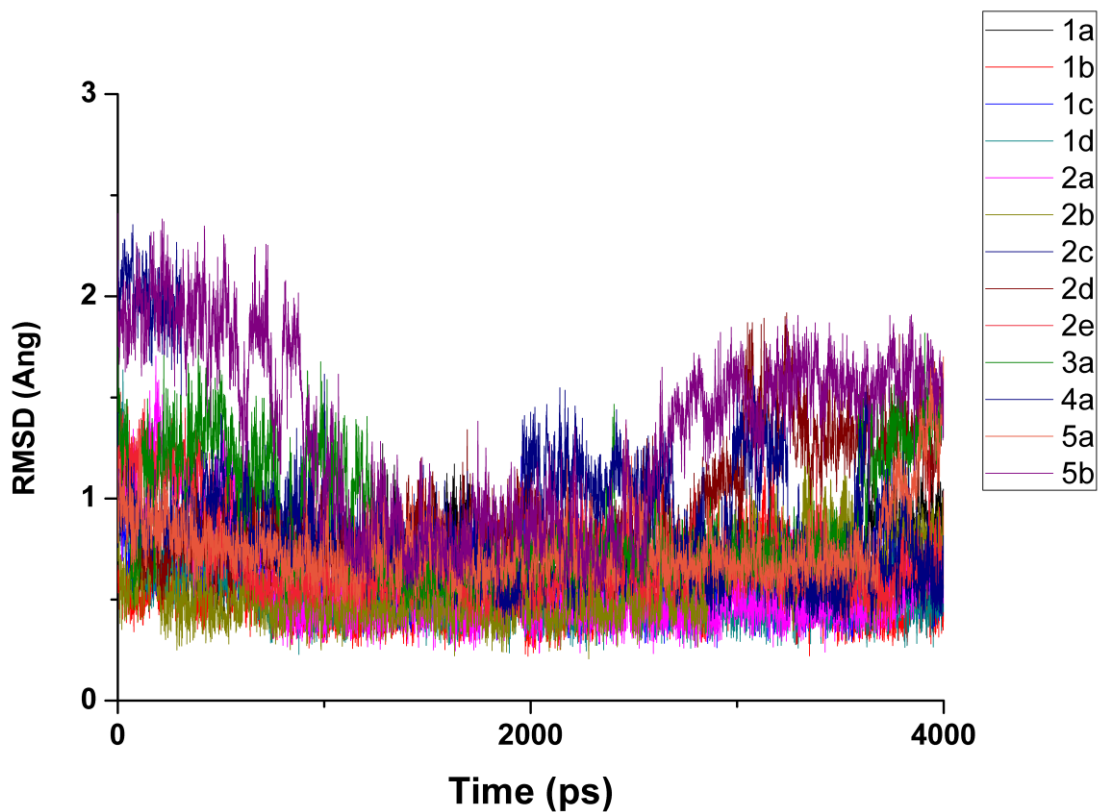

**Table S1.** The  $\alpha$  and  $\beta$  parameters used for each simulated inhibitor.

| <b>Inhibitor</b> | <b><math>\alpha</math></b> | <b><math>\beta</math></b> |
|------------------|----------------------------|---------------------------|
| 1a               | 0.18                       | 0.37                      |
| 1b               | 0.18                       | 0.37                      |
| 1c               | 0.18                       | 0.37                      |
| 1d               | 0.18                       | 0.37                      |
| 2a               | 0.18                       | 0.37                      |
| 2b               | 0.18                       | 0.37                      |
| 2c               | 0.18                       | 0.33                      |
| 2d               | 0.18                       | 0.37                      |
| 2e               | 0.18                       | 0.37                      |
| 3a               | 0.18                       | 0.37                      |
| 4a               | 0.18                       | 0.37                      |
| 5a               | 0.18                       | 0.37                      |
| 5b               | 0.18                       | 0.37                      |

**Table S2.** Values of  $S_{\text{CALC}}$  and  $S_{\text{EXP}}$ .

| Inhibitor | $S_{\text{EXP}}$ | $S_{\text{TEO}}$ |
|-----------|------------------|------------------|
| 1a        | 0.97             | 0.98             |
| 1b        | 0.96             | 0.94             |
| 1c        | 0.88             | 0.88             |
| 1d        | 0.93             | 0.95             |
| 2a        | 0.83             | 0.86             |
| 2b        | 0.89             | 0.88             |
| 2c        | 0.91             | 0.93             |
| 2d        | 0.94             | 0.95             |
| 2e        | 1.03             | 1.03             |
| 3a        | 0.77             | 0.73             |
| 4a        | 0.87             | 0.86             |
| 5a        | 0.76             | 0.77             |
| 5b        | 0.77             | 0.78             |

**Table S3.** Per-residue decomposition values (kcal/mol) for simulated inhibitor in PlmIV (Part 1)

| Residue | 1a    |       | 1b    |       | 1c    |       | 1d    |       | 2a    |       | 2b    |       | 2c    |       | 2d    |       |
|---------|-------|-------|-------|-------|-------|-------|-------|-------|-------|-------|-------|-------|-------|-------|-------|-------|
|         | Vvdw  | Vele  |
| 1       | 0     | 0     | 0     | 0     | 0     | 0     | 0     | 0     | 0     | 0     | 0     | 0     | 0     | 0     | 0     | 0     |
| 2       | 0     | -0.01 | 0     | -0.01 | 0     | -0.01 | 0     | -0.01 | 0     | -0.01 | 0     | 0     | 0     | -0.01 | 0     | -0.01 |
| 3       | 0     | 0.01  | 0     | 0.01  | 0     | 0.01  | 0     | 0.01  | 0     | 0.01  | 0     | 0     | 0     | 0.01  | 0     | 0.01  |
| 4       | 0     | 0.01  | 0     | 0     | 0     | 0     | 0     | -0.01 | 0     | 0     | 0     | 0     | 0     | 0     | 0     | 0     |
| 5       | 0     | 0     | 0     | 0     | 0     | 0     | 0     | 0.01  | 0     | 0     | 0     | 0     | 0     | 0     | 0     | 0     |
| 6       | 0     | 0.01  | 0     | 0.01  | 0     | 0     | 0     | 0     | 0     | 0.01  | 0     | 0     | -0.01 | 0.01  | 0     | 0.01  |
| 7       | 0     | -0.02 | 0     | -0.03 | 0     | -0.01 | 0     | -0.02 | 0     | -0.02 | 0     | -0.01 | 0     | -0.04 | 0     | -0.03 |
| 8       | -0.02 | 0.01  | -0.02 | 0.04  | -0.02 | 0.02  | -0.01 | 0.03  | -0.01 | 0.01  | -0.01 | 0.02  | -0.02 | 0.05  | -0.02 | 0.03  |
| 9       | -0.01 | -0.02 | -0.01 | -0.05 | -0.01 | -0.02 | -0.01 | -0.03 | -0.01 | -0.02 | -0.01 | -0.02 | -0.01 | -0.08 | -0.01 | -0.04 |
| 10      | -0.03 | 0     | -0.03 | 0     | -0.02 | 0     | -0.01 | 0.01  | -0.02 | 0     | -0.01 | 0.01  | -0.03 | 0.04  | -0.03 | 0.01  |
| 11      | -0.07 | 0.03  | -0.06 | 0.02  | -0.04 | 0     | -0.03 | 0     | -0.03 | 0.01  | -0.03 | 0     | -0.06 | 0.01  | -0.06 | 0.02  |
| 12      | -0.03 | 0.04  | -0.02 | 0.02  | -0.02 | 0.01  | -0.01 | 0.01  | -0.01 | 0.02  | -0.01 | 0.01  | -0.02 | 0.05  | -0.02 | 0.02  |
| 13      | -0.54 | -0.11 | -0.15 | -0.04 | -0.18 | -0.06 | -0.07 | 0.02  | -0.1  | -0.06 | -0.08 | -0.05 | -0.28 | -0.22 | -0.23 | 0.1   |
| 14      | -0.48 | 0.21  | -0.21 | 0.17  | -0.23 | 0.12  | -0.07 | 0.08  | -0.12 | 0.12  | -0.09 | 0.07  | -0.57 | 0.47  | -0.28 | 0.2   |
| 15      | -2.48 | 0.37  | -2.24 | 0.44  | -2.07 | -0.11 | -0.7  | 0.32  | -0.96 | 0.42  | -0.8  | 0.25  | -2.9  | 0.54  | -1.93 | 0.25  |
| 16      | -0.22 | -0.02 | -0.24 | -0.12 | -0.16 | -0.02 | -0.12 | -0.06 | -0.13 | -0.02 | -0.11 | -0.05 | -0.26 | -0.22 | -0.25 | -0.1  |
| 17      | -0.06 | 0.05  | -0.07 | 0.08  | -0.05 | 0.03  | -0.04 | 0.03  | -0.04 | 0.05  | -0.04 | 0.02  | -0.07 | 0.05  | -0.06 | 0.06  |
| 18      | -0.01 | -0.01 | -0.01 | -0.03 | -0.01 | -0.01 | -0.01 | -0.01 | -0.01 | -0.01 | -0.01 | -0.01 | -0.01 | -0.04 | -0.01 | -0.03 |
| 19      | -0.01 | -0.01 | -0.01 | -0.03 | -0.01 | -0.03 | 0     | -0.04 | 0     | -0.02 | 0     | -0.02 | -0.01 | -0.02 | -0.01 | -0.04 |
| 20      | 0     | 0     | 0     | 0     | 0     | 0.01  | 0     | 0.01  | 0     | 0.01  | 0     | 0     | 0     | 0     | 0     | 0     |



|     |       |       |       |       |       |       |       |       |       |       |       |       |       |       |       |       |
|-----|-------|-------|-------|-------|-------|-------|-------|-------|-------|-------|-------|-------|-------|-------|-------|-------|
| 65  | 0     | 0     | 0     | 0     | 0     | 0     | 0     | 0     | 0     | 0     | 0     | 0     | 0     | 0     | 0     | 0     |
| 66  | 0     | 0.01  | 0     | 0.02  | 0     | 0.01  | 0     | 0.01  | 0     | 0.01  | 0     | 0.01  | 0     | 0.01  | 0     | 0.01  |
| 67  | 0     | 0     | 0     | -0.01 | 0     | 0     | 0     | -0.01 | 0     | -0.01 | 0     | 0     | 0     | -0.01 | 0     | -0.01 |
| 68  | 0     | 0     | 0     | 0     | 0     | 0     | 0     | 0     | 0     | 0     | 0     | 0     | 0     | 0     | 0     | 0     |
| 69  | 0     | 0     | 0     | 0.01  | 0     | 0     | 0     | 0     | 0     | 0     | 0     | 0     | 0     | 0     | 0     | 0     |
| 70  | 0     | 0     | 0     | 0.01  | 0     | 0.01  | 0     | 0.01  | 0     | 0.01  | 0     | 0.01  | 0     | 0.01  | 0     | 0.01  |
| 71  | 0     | 0     | 0     | -0.01 | 0     | 0     | 0     | -0.01 | 0     | -0.01 | 0     | 0     | 0     | -0.01 | 0     | -0.01 |
| 72  | 0     | 0     | 0     | 0     | 0     | -0.01 | 0     | -0.01 | 0     | -0.01 | 0     | -0.01 | 0     | 0     | 0     | -0.01 |
| 73  | -0.01 | 0     | -0.01 | -0.01 | -0.01 | 0     | -0.01 | 0     | -0.01 | 0.01  | -0.01 | -0.01 | -0.01 | -0.01 | -0.01 | 0     |
| 74  | -0.05 | -0.05 | -0.02 | 0.02  | -0.02 | -0.04 | -0.02 | -0.03 | -0.02 | 0.01  | -0.03 | -0.02 | -0.02 | -0.01 | -0.02 | -0.01 |
| 75  | -0.82 | -0.01 | -0.17 | 0.05  | -0.13 | 0.04  | -0.14 | 0.06  | -0.18 | 0.11  | -0.22 | 0.01  | -0.13 | 0.03  | -0.19 | 0.07  |
| 76  | -1.4  | 0.21  | -0.36 | -0.24 | -0.33 | -0.27 | -0.27 | -0.31 | -0.4  | -0.39 | -1.35 | -0.13 | -0.32 | -0.19 | -0.41 | -0.3  |
| 77  | -7.29 | -0.95 | -5.8  | -0.69 | -5.11 | -1.14 | -4.84 | -1.67 | -6.26 | -1.36 | -7.22 | -1.9  | -4.98 | -0.64 | -6.22 | -1.72 |
| 78  | -2.21 | -0.78 | -4.07 | -2.28 | -5.17 | -2.79 | -4.52 | -1.82 | -5.01 | -3.02 | -4.26 | -1.64 | -4.49 | -1.84 | -4.5  | -2.78 |
| 79  | -1.81 | -0.43 | -1.56 | -0.44 | -4.66 | -1.97 | -3.99 | -4.59 | -5.03 | -2.7  | -3.75 | -2.27 | -2.02 | -0.46 | -4.94 | -3.01 |
| 80  | -0.23 | 0.14  | -0.28 | 0.19  | -0.38 | 0.5   | -0.48 | 0.18  | -0.5  | 0.39  | -0.49 | 0.49  | -0.24 | 0.23  | -0.57 | 0.5   |
| 81  | -0.1  | 0.02  | -0.1  | 0.05  | -0.1  | 0.17  | -0.11 | 0.12  | -0.13 | 0.08  | -0.15 | 0.05  | -0.08 | 0.07  | -0.15 | 0.23  |
| 82  | -0.1  | 0.02  | -0.1  | 0.04  | -0.08 | 0.04  | -0.09 | 0.05  | -0.11 | 0.02  | -0.1  | 0.04  | -0.07 | 0.05  | -0.13 | 0.05  |
| 83  | -0.02 | -0.01 | -0.01 | -0.01 | -0.01 | -0.01 | -0.01 | -0.01 | -0.02 | 0     | -0.02 | -0.01 | -0.01 | -0.01 | -0.02 | -0.01 |
| 84  | 0     | 0.01  | 0     | 0.01  | 0     | 0.01  | 0     | 0.02  | 0     | 0.01  | 0     | 0.01  | 0     | 0.02  | 0     | 0.02  |
| 85  | 0     | 0     | 0     | -0.01 | 0     | 0     | 0     | 0     | 0     | 0     | 0     | 0     | 0     | -0.01 | 0     | 0     |
| 86  | -0.01 | 0.01  | -0.01 | 0.02  | 0     | 0.01  | 0     | 0.02  | -0.01 | 0.02  | -0.01 | 0.01  | 0     | 0.01  | -0.01 | 0.02  |
| 87  | 0     | 0     | 0     | -0.01 | 0     | 0     | 0     | -0.01 | 0     | -0.02 | 0     | 0     | 0     | 0     | 0     | -0.01 |
| 88  | 0     | 0     | 0     | 0.01  | 0     | 0.01  | 0     | 0.01  | 0     | 0.01  | 0     | 0     | 0     | 0.01  | 0     | 0.01  |
| 89  | 0     | 0     | 0     | 0.01  | 0     | 0     | 0     | 0     | 0     | 0     | 0     | 0     | 0     | 0.01  | 0     | 0     |
| 90  | 0     | 0     | 0     | -0.01 | 0     | 0     | 0     | 0     | 0     | 0     | 0     | 0     | 0     | -0.01 | 0     | 0     |
| 91  | 0     | 0.01  | 0     | 0.02  | 0     | 0.01  | 0     | 0.01  | 0     | 0.01  | 0     | 0.01  | 0     | 0.02  | 0     | 0.02  |
| 92  | 0     | 0     | 0     | -0.01 | 0     | 0     | 0     | 0     | 0     | 0     | 0     | 0     | 0     | -0.01 | 0     | -0.01 |
| 93  | 0     | 0     | 0     | 0.01  | 0     | 0     | 0     | 0     | 0     | 0     | 0     | 0     | 0     | 0.01  | 0     | 0.01  |
| 94  | 0     | 0     | 0     | 0     | 0     | 0     | 0     | 0     | 0     | 0     | 0     | 0     | 0     | 0.01  | 0     | 0     |
| 95  | 0     | 0     | 0     | 0.01  | 0     | 0.01  | 0     | 0.02  | 0     | 0.01  | 0     | 0.01  | 0     | 0.02  | 0     | 0.01  |
| 96  | 0     | 0     | 0     | -0.01 | 0     | 0     | 0     | 0     | 0     | 0     | 0     | 0     | 0     | -0.01 | 0     | -0.01 |
| 97  | 0     | 0     | 0     | 0     | 0     | 0     | 0     | 0     | 0     | 0     | 0     | 0     | 0     | 0     | 0     | 0     |
| 98  | 0     | 0     | 0     | -0.01 | 0     | -0.01 | 0     | -0.01 | 0     | -0.01 | 0     | 0     | 0     | -0.01 | 0     | -0.01 |
| 99  | 0     | 0     | 0     | 0     | 0     | 0     | 0     | 0     | 0     | 0     | 0     | 0     | 0     | 0     | 0     | 0     |
| 100 | -0.01 | -0.01 | -0.01 | -0.01 | 0     | -0.01 | 0     | -0.01 | 0     | -0.01 | 0     | -0.01 | 0     | -0.01 | 0     | -0.01 |
| 101 | 0     | -0.02 | 0     | -0.02 | 0     | -0.02 | 0     | -0.03 | 0     | -0.03 | 0     | -0.01 | 0     | -0.02 | 0     | -0.03 |
| 102 | -0.01 | 0.02  | -0.01 | 0.04  | -0.01 | 0.03  | -0.01 | 0.03  | -0.01 | 0.04  | -0.01 | 0.02  | -0.01 | 0.04  | -0.01 | 0.04  |
| 103 | -0.02 | -0.01 | -0.02 | -0.01 | -0.01 | -0.01 | -0.01 | -0.01 | -0.01 | 0     | -0.01 | -0.01 | -0.01 | -0.02 | -0.02 | -0.02 |
| 104 | -0.01 | 0     | 0     | 0.02  | 0     | 0.01  | 0     | 0.01  | 0     | 0.01  | 0     | 0.01  | 0     | 0.02  | -0.01 | 0.02  |
| 105 | -0.02 | -0.01 | -0.02 | 0.01  | -0.01 | -0.01 | -0.02 | -0.01 | -0.02 | 0.01  | -0.02 | -0.01 | -0.01 | 0     | -0.02 | 0     |
| 106 | 0     | -0.01 | 0     | -0.01 | 0     | -0.01 | 0     | -0.02 | 0     | -0.01 | 0     | -0.01 | 0     | -0.02 | -0.01 | -0.01 |
| 107 | -0.01 | 0.02  | -0.01 | 0     | -0.01 | 0.03  | -0.01 | 0.03  | -0.01 | 0     | -0.01 | 0.03  | -0.01 | 0.02  | -0.01 | 0.02  |
| 108 | -0.03 | 0.03  | -0.03 | 0.01  | -0.03 | 0.05  | -0.03 | 0.05  | -0.03 | 0.02  | -0.04 | 0.05  | -0.02 | 0.05  | -0.04 | 0.06  |
| 109 | -0.02 | 0.04  | -0.02 | 0.02  | -0.02 | 0.02  | -0.02 | 0.02  | -0.02 | 0.02  | -0.02 | 0.03  | -0.02 | 0.02  | -0.02 | 0.02  |

|     |       |       |       |       |       |       |       |       |       |       |       |       |       |       |       |       |
|-----|-------|-------|-------|-------|-------|-------|-------|-------|-------|-------|-------|-------|-------|-------|-------|-------|
| 110 | -0.08 | -0.05 | -0.08 | 0.07  | -0.1  | 0.08  | -0.1  | 0.05  | -0.1  | 0.05  | -0.11 | 0.06  | -0.07 | 0.08  | -0.13 | 0.08  |
| 111 | -1.59 | -0.17 | -2.01 | -0.11 | -1.46 | -0.06 | -1.21 | -0.2  | -1.33 | -0.1  | -1.41 | -0.04 | -1.81 | -0.27 | -1.59 | -0.11 |
| 112 | -0.1  | -0.02 | -0.11 | 0.01  | -0.16 | 0.03  | -0.13 | 0.02  | -0.12 | 0.02  | -0.16 | 0.01  | -0.09 | 0.08  | -0.17 | 0.05  |
| 113 | -0.14 | 0.02  | -0.09 | -0.05 | -0.16 | 0     | -0.1  | -0.04 | -0.09 | -0.02 | -0.15 | -0.02 | -0.08 | -0.11 | -0.14 | -0.03 |
| 114 | -2.87 | -0.09 | -1.88 | -0.1  | -3.38 | -0.07 | -2.58 | -0.13 | -2.15 | -0.04 | -3.49 | -0.14 | -1.72 | -0.63 | -3.04 | -0.13 |
| 115 | -0.39 | -0.04 | -0.43 | -0.01 | -0.4  | -0.05 | -0.5  | -0.1  | -0.42 | -0.05 | -0.59 | -0.06 | -0.34 | -0.2  | -0.51 | -0.09 |
| 116 | -0.05 | 0.02  | -0.06 | -0.01 | -0.06 | -0.01 | -0.06 | -0.02 | -0.05 | 0     | -0.05 | -0.01 | -0.05 | -0.07 | -0.06 | -0.03 |
| 117 | -0.12 | 0.05  | -0.13 | 0.02  | -0.14 | -0.03 | -0.12 | -0.02 | -0.09 | 0     | -0.09 | -0.02 | -0.1  | -0.15 | -0.13 | -0.01 |
| 118 | -0.37 | 0.05  | -0.86 | 0.05  | -0.43 | 0.03  | -0.34 | 0.1   | -0.22 | 0.07  | -0.24 | 0.08  | -0.29 | 0.29  | -0.55 | 0.11  |
| 119 | -0.1  | 0.03  | -0.12 | 0.05  | -0.08 | 0.01  | -0.07 | 0.03  | -0.06 | 0.04  | -0.07 | 0.03  | -0.09 | 0.17  | -0.11 | 0.05  |
| 120 | -1.64 | 0.04  | -2.13 | -0.13 | -1.87 | 0.09  | -1.74 | 0.12  | -1.49 | 0.04  | -1.56 | 0.02  | -1.87 | 0.06  | -2.11 | -0.06 |
| 121 | -0.05 | 0.01  | -0.06 | 0.01  | -0.05 | 0.02  | -0.05 | 0.02  | -0.05 | 0.02  | -0.05 | 0.01  | -0.06 | 0     | -0.06 | 0.03  |
| 122 | -0.09 | -0.03 | -0.13 | -0.07 | -0.08 | 0.04  | -0.09 | 0.02  | -0.09 | 0.02  | -0.08 | -0.01 | -0.12 | -0.03 | -0.09 | -0.02 |
| 123 | -1.87 | 0.1   | -1.92 | 0.14  | -1.54 | 0.17  | -1.6  | 0.18  | -1.88 | 0.11  | -1.69 | 0.09  | -1.83 | 0.2   | -1.57 | 0.21  |
| 124 | -0.09 | -0.07 | -0.1  | -0.08 | -0.07 | -0.08 | -0.08 | -0.11 | -0.08 | -0.06 | -0.06 | -0.05 | -0.09 | -0.1  | -0.07 | -0.09 |
| 125 | -0.08 | 0.16  | -0.07 | 0.19  | -0.05 | 0.18  | -0.06 | 0.22  | -0.06 | 0.2   | -0.04 | 0.1   | -0.06 | 0.13  | -0.06 | 0.18  |
| 126 | -0.06 | 0.09  | -0.06 | 0.13  | -0.05 | 0.12  | -0.05 | 0.13  | -0.05 | 0.1   | -0.04 | 0.06  | -0.06 | 0.1   | -0.05 | 0.12  |
| 127 | -0.04 | 0.03  | -0.03 | 0.04  | -0.02 | 0.05  | -0.03 | 0.08  | -0.03 | 0.09  | -0.02 | 0.03  | -0.03 | -0.01 | -0.03 | 0.04  |
| 128 | -0.03 | -0.08 | -0.03 | -0.08 | -0.02 | -0.06 | -0.02 | -0.09 | -0.02 | -0.12 | -0.02 | -0.02 | -0.02 | -0.05 | -0.02 | -0.08 |
| 129 | -0.01 | -0.03 | -0.01 | -0.03 | -0.01 | -0.02 | -0.01 | -0.04 | -0.01 | -0.06 | -0.01 | 0     | -0.01 | -0.01 | -0.01 | -0.03 |
| 130 | -0.03 | -0.01 | -0.01 | 0     | -0.01 | 0.01  | -0.01 | 0.02  | -0.01 | 0     | -0.01 | 0.02  | -0.01 | 0     | -0.01 | 0.01  |
| 131 | -0.73 | -0.05 | -0.22 | -0.02 | -0.17 | 0     | -0.16 | 0     | -0.23 | -0.07 | -0.22 | 0.04  | -0.16 | 0.01  | -0.23 | -0.03 |
| 132 | -0.08 | 0.07  | -0.02 | 0.08  | -0.02 | 0.05  | -0.02 | 0.05  | -0.02 | 0.07  | -0.02 | 0.03  | -0.02 | 0.06  | -0.02 | 0.07  |
| 133 | -0.38 | -0.01 | -0.04 | -0.01 | -0.03 | -0.02 | -0.03 | -0.02 | -0.04 | 0     | -0.05 | -0.02 | -0.03 | -0.02 | -0.04 | -0.02 |
| 134 | -0.01 | -0.01 | 0     | -0.01 | 0     | -0.01 | 0     | -0.01 | 0     | 0     | 0     | -0.01 | 0     | -0.01 | 0     | -0.01 |
| 135 | -0.01 | 0.03  | 0     | 0.04  | 0     | 0.03  | 0     | 0.05  | 0     | 0.06  | 0     | 0.01  | 0     | 0.02  | 0     | 0.04  |
| 136 | -0.01 | 0     | -0.01 | -0.01 | -0.01 | -0.01 | -0.01 | -0.02 | -0.01 | -0.02 | -0.01 | -0.01 | -0.01 | 0     | -0.01 | -0.01 |
| 137 | 0     | -0.01 | 0     | -0.01 | 0     | -0.01 | 0     | -0.01 | 0     | -0.01 | 0     | 0     | 0     | -0.01 | 0     | -0.01 |
| 138 | -0.01 | 0.03  | -0.01 | 0.04  | 0     | 0.03  | 0     | 0.04  | -0.01 | 0.04  | 0     | 0.02  | -0.01 | 0.03  | -0.01 | 0.04  |
| 139 | -0.01 | 0.02  | -0.01 | 0.04  | -0.01 | 0.03  | -0.01 | 0.04  | -0.01 | 0.03  | 0     | 0.02  | -0.01 | 0.04  | -0.01 | 0.04  |
| 140 | 0     | 0.02  | 0     | 0.03  | 0     | 0.03  | 0     | 0.04  | 0     | 0.03  | 0     | 0.02  | 0     | 0.03  | 0     | 0.03  |
| 141 | 0     | 0.01  | 0     | 0.02  | 0     | 0.02  | 0     | 0.03  | 0     | 0.02  | 0     | 0.01  | 0     | 0.02  | 0     | 0.02  |
| 142 | 0     | 0.02  | 0     | 0.03  | 0     | 0.03  | 0     | 0.04  | 0     | 0.03  | 0     | 0.02  | 0     | 0.03  | 0     | 0.03  |
| 143 | 0     | 0.01  | 0     | 0.01  | 0     | 0.01  | 0     | 0.02  | 0     | 0.01  | 0     | 0.01  | 0     | 0.01  | 0     | 0.01  |
| 144 | 0     | 0     | 0     | 0.01  | 0     | 0.01  | 0     | 0.02  | 0     | 0.01  | 0     | 0.01  | 0     | 0.01  | 0     | 0.01  |
| 145 | 0     | 0.01  | 0     | 0.02  | 0     | 0.01  | 0     | 0.02  | 0     | 0.02  | 0     | 0     | 0     | 0.01  | 0     | 0.02  |
| 146 | 0     | 0     | 0     | 0.01  | 0     | 0     | 0     | 0.01  | 0     | 0.01  | 0     | 0     | 0     | 0     | 0     | 0.01  |
| 147 | 0     | 0     | 0     | 0     | 0     | 0     | 0     | 0.01  | 0     | 0.01  | 0     | 0     | 0     | 0     | 0     | 0     |
| 148 | 0     | 0     | 0     | -0.01 | 0     | 0     | 0     | 0     | 0     | 0     | 0     | 0     | 0     | -0.01 | 0     | -0.01 |
| 149 | 0     | 0     | 0     | 0     | 0     | 0     | 0     | 0.01  | 0     | 0     | 0     | 0     | 0     | 0     | 0     | 0     |
| 150 | 0     | 0     | 0     | 0     | 0     | 0     | 0     | 0     | 0     | 0     | 0     | 0     | 0     | 0     | 0     | 0     |
| 151 | 0     | 0     | 0     | -0.01 | 0     | 0     | 0     | -0.01 | 0     | 0     | 0     | -0.01 | 0     | -0.01 | 0     | -0.01 |
| 152 | 0     | 0.01  | 0     | 0.01  | 0     | 0.01  | 0     | 0     | 0     | 0.01  | 0     | 0     | 0     | 0.01  | 0     | 0.01  |
| 153 | 0     | 0     | 0     | 0.01  | 0     | 0.01  | 0     | 0.02  | 0     | 0     | 0     | 0.01  | 0     | 0     | 0     | 0.01  |
| 154 | -0.02 | 0     | -0.01 | 0     | -0.01 | 0     | -0.01 | 0     | -0.01 | 0     | -0.01 | 0     | -0.01 | 0.01  | -0.01 | 0     |

|     |       |       |       |       |       |       |       |       |       |       |       |       |       |       |       |       |
|-----|-------|-------|-------|-------|-------|-------|-------|-------|-------|-------|-------|-------|-------|-------|-------|-------|
| 155 | 0     | -0.01 | 0     | -0.01 | 0     | 0     | 0     | 0     | 0     | -0.01 | 0     | 0     | 0     | -0.02 | 0     | -0.01 |
| 156 | -0.04 | 0.01  | -0.04 | 0.02  | -0.03 | 0.01  | -0.03 | 0.01  | -0.03 | 0.02  | -0.02 | 0.01  | -0.04 | 0.02  | -0.03 | 0.02  |
| 157 | -0.01 | -0.01 | -0.01 | -0.02 | -0.01 | -0.01 | 0     | -0.01 | 0     | -0.01 | 0     | -0.01 | -0.01 | -0.03 | -0.01 | -0.01 |
| 158 | -0.02 | -0.02 | -0.02 | 0     | -0.02 | 0     | -0.01 | 0     | -0.01 | -0.01 | -0.01 | 0     | -0.02 | 0.01  | -0.02 | 0     |
| 159 | -0.01 | 0.02  | -0.01 | 0.02  | 0     | 0.01  | 0     | 0.02  | 0     | 0.02  | 0     | 0.01  | -0.01 | 0.03  | -0.01 | 0.02  |
| 160 | -0.01 | 0     | -0.01 | -0.02 | 0     | -0.01 | 0     | -0.02 | 0     | -0.01 | 0     | -0.01 | -0.01 | -0.03 | -0.01 | -0.01 |
| 161 | -0.01 | -0.02 | -0.01 | -0.04 | -0.01 | -0.02 | -0.01 | -0.04 | -0.01 | -0.02 | -0.01 | -0.02 | -0.01 | -0.07 | -0.01 | -0.03 |
| 162 | 0     | 0     | 0     | -0.01 | 0     | 0     | 0     | 0     | 0     | 0     | 0     | 0     | 0     | 0     | 0     | 0     |
| 163 | 0     | -0.01 | 0     | 0     | 0     | 0     | 0     | 0     | 0     | 0     | 0     | 0     | 0     | 0     | 0     | 0     |
| 164 | 0     | 0     | 0     | 0.01  | 0     | 0.01  | 0     | 0.01  | 0     | 0.01  | 0     | 0     | 0     | 0.01  | 0     | 0.01  |
| 165 | 0     | 0     | 0     | 0.01  | 0     | 0.01  | 0     | 0.02  | 0     | 0     | 0     | 0.01  | 0     | 0.03  | 0     | 0.01  |
| 166 | 0     | -0.02 | 0     | 0     | 0     | 0     | 0     | 0.02  | 0     | -0.01 | 0     | 0.01  | 0     | 0.01  | 0     | 0.01  |
| 167 | -0.01 | 0.01  | -0.01 | 0.02  | 0     | 0.01  | 0     | 0.02  | 0     | 0.02  | 0     | 0.01  | -0.01 | 0.03  | 0     | 0.02  |
| 168 | -0.01 | 0.01  | -0.01 | 0.02  | -0.01 | 0.02  | -0.01 | 0.03  | -0.01 | 0.01  | -0.01 | 0.01  | -0.01 | 0.02  | -0.01 | 0.02  |
| 169 | 0     | 0.01  | 0     | 0     | 0     | 0     | 0     | 0     | 0     | 0     | 0     | 0     | 0     | 0.01  | 0     | 0     |
| 170 | 0     | 0.01  | 0     | 0.01  | 0     | 0.01  | 0     | 0.01  | 0     | 0.01  | 0     | 0.01  | 0     | 0.01  | 0     | 0.01  |
| 171 | 0     | 0     | 0     | 0.01  | 0     | 0.01  | 0     | 0.01  | 0     | 0.01  | 0     | 0.01  | 0     | 0.01  | 0     | 0.01  |
| 172 | 0     | 0     | 0     | -0.01 | 0     | 0     | 0     | -0.01 | 0     | 0     | 0     | 0     | 0     | -0.01 | 0     | -0.01 |
| 173 | 0     | -0.01 | 0     | 0     | 0     | 0     | 0     | 0     | 0     | 0     | 0     | 0     | 0     | 0     | 0     | 0     |
| 174 | 0     | 0     | 0     | 0     | 0     | 0     | 0     | 0     | 0     | 0     | 0     | 0     | 0     | 0     | 0     | 0     |
| 175 | 0     | 0     | 0     | 0     | 0     | 0     | 0     | 0     | 0     | 0     | 0     | 0     | 0     | 0     | 0     | 0     |
| 176 | 0     | 0.01  | 0     | 0     | 0     | 0     | 0     | 0     | 0     | 0     | 0     | 0     | 0     | 0     | 0     | 0     |
| 177 | 0     | 0.01  | 0     | 0     | 0     | 0     | 0     | 0     | 0     | 0.01  | 0     | 0     | 0     | 0     | 0     | 0     |
| 178 | 0     | -0.01 | 0     | -0.01 | 0     | 0     | 0     | 0     | 0     | -0.01 | 0     | 0     | 0     | -0.01 | 0     | -0.01 |
| 179 | 0     | 0.01  | 0     | 0     | 0     | 0     | 0     | 0     | 0     | 0     | 0     | 0     | 0     | 0     | 0     | 0     |
| 180 | 0     | 0     | 0     | -0.01 | 0     | 0     | 0     | -0.01 | 0     | 0     | 0     | 0     | 0     | -0.01 | 0     | -0.01 |
| 181 | 0     | 0.01  | 0     | 0     | 0     | 0     | 0     | 0     | 0     | 0.01  | 0     | 0     | 0     | 0     | 0     | 0     |
| 182 | 0     | -0.01 | 0     | 0     | 0     | 0     | 0     | 0.01  | 0     | 0     | 0     | 0.01  | 0     | 0     | 0     | 0.01  |
| 183 | 0     | 0.01  | 0     | 0     | 0     | 0     | 0     | 0     | 0     | 0     | 0     | 0     | 0     | 0     | 0     | 0     |
| 184 | 0     | 0     | 0     | 0     | 0     | 0     | 0     | 0.01  | 0     | 0     | 0     | 0     | 0     | 0     | 0     | 0     |
| 185 | 0     | -0.02 | 0     | -0.02 | 0     | -0.01 | 0     | -0.02 | 0     | -0.02 | 0     | -0.01 | 0     | -0.02 | 0     | -0.02 |
| 186 | 0     | 0.02  | 0     | 0.02  | 0     | 0.01  | 0     | 0.01  | 0     | 0.02  | 0     | 0     | 0     | 0.02  | 0     | 0.01  |
| 187 | -0.01 | 0     | -0.01 | 0.01  | -0.01 | 0.01  | -0.01 | 0.03  | -0.01 | 0.01  | -0.01 | 0.01  | -0.01 | 0     | -0.01 | 0.01  |
| 188 | -0.01 | -0.03 | -0.01 | -0.02 | -0.01 | -0.01 | -0.01 | -0.02 | -0.01 | -0.05 | -0.01 | 0.01  | -0.01 | -0.02 | -0.01 | -0.02 |
| 189 | -0.01 | -0.01 | -0.01 | 0     | -0.01 | 0     | -0.01 | 0     | -0.01 | 0     | -0.01 | 0     | -0.01 | 0     | -0.01 | 0     |
| 190 | -0.01 | -0.01 | -0.01 | -0.01 | -0.01 | 0     | -0.01 | 0     | -0.01 | -0.01 | -0.01 | 0     | -0.01 | -0.01 | -0.01 | -0.01 |
| 191 | -0.07 | -0.07 | -0.05 | -0.07 | -0.04 | -0.06 | -0.04 | -0.05 | -0.05 | -0.04 | -0.05 | -0.03 | -0.04 | -0.06 | -0.05 | -0.06 |
| 192 | -1.03 | 0.02  | -1.05 | -0.01 | -0.98 | 0.08  | -0.9  | 0.15  | -1.19 | 0.1   | -1.04 | 0.05  | -0.86 | -0.01 | -1.1  | 0.07  |
| 193 | -0.05 | 0.08  | -0.05 | 0.06  | -0.05 | 0.05  | -0.05 | 0.06  | -0.05 | 0.07  | -0.04 | 0.03  | -0.05 | 0.05  | -0.05 | 0.06  |
| 194 | -0.03 | -0.09 | -0.04 | -0.08 | -0.03 | -0.07 | -0.03 | -0.05 | -0.04 | -0.1  | -0.03 | 0     | -0.03 | -0.07 | -0.04 | -0.08 |
| 195 | -0.01 | 0.02  | -0.01 | 0.01  | -0.01 | 0.01  | -0.01 | 0     | -0.01 | 0.01  | -0.01 | -0.01 | -0.01 | 0.01  | -0.01 | 0.01  |
| 196 | 0     | -0.02 | 0     | -0.02 | 0     | -0.02 | 0     | -0.03 | 0     | -0.03 | 0     | -0.01 | 0     | -0.02 | 0     | -0.02 |
| 197 | 0     | 0.01  | 0     | 0.01  | 0     | 0     | 0     | 0     | 0     | 0     | 0     | 0     | 0     | 0.01  | 0     | 0.01  |
| 198 | 0     | 0.01  | 0     | 0     | 0     | 0     | 0     | -0.01 | 0     | 0     | 0     | -0.01 | 0     | 0     | 0     | -0.01 |
| 199 | 0     | -0.02 | 0     | -0.01 | 0     | 0     | 0     | 0     | 0     | -0.01 | 0     | 0     | 0     | -0.01 | 0     | 0     |

|     |       |       |       |       |       |       |       |       |       |       |       |       |       |       |       |       |
|-----|-------|-------|-------|-------|-------|-------|-------|-------|-------|-------|-------|-------|-------|-------|-------|-------|
| 200 | 0     | 0     | 0     | -0.01 | 0     | 0     | 0     | -0.01 | 0     | -0.01 | 0     | 0     | 0     | -0.01 | 0     | -0.01 |
| 201 | -0.01 | -0.02 | -0.01 | 0     | -0.01 | 0     | -0.01 | 0     | -0.01 | 0     | -0.01 | 0     | -0.01 | -0.01 | -0.01 | 0     |
| 202 | 0     | 0     | 0     | 0     | 0     | 0     | 0     | 0     | 0     | 0     | 0     | 0     | 0     | 0     | 0     | 0     |
| 203 | 0     | 0.01  | 0     | 0     | 0     | 0     | 0     | -0.01 | 0     | 0     | 0     | 0     | 0     | 0     | 0     | 0     |
| 204 | 0     | 0.01  | 0     | 0     | 0     | 0     | 0     | -0.01 | 0     | 0     | 0     | 0     | 0     | 0     | 0     | 0     |
| 205 | 0     | -0.01 | 0     | 0     | 0     | 0     | 0     | 0     | 0     | 0     | 0     | 0     | 0     | 0     | 0     | 0     |
| 206 | 0     | 0.01  | 0     | 0.01  | 0     | 0     | 0     | 0.01  | 0     | 0.02  | 0     | 0     | 0     | 0.01  | 0     | 0.01  |
| 207 | 0     | -0.01 | 0     | 0     | 0     | 0     | 0     | 0     | 0     | 0     | 0     | 0     | 0     | 0     | 0     | 0     |
| 208 | 0     | 0     | 0     | 0.01  | 0     | 0.01  | 0     | 0.01  | 0     | 0     | 0     | 0.01  | 0     | 0.01  | 0     | 0.01  |
| 209 | 0     | -0.04 | -0.01 | -0.03 | 0     | -0.02 | 0     | -0.03 | 0     | -0.04 | 0     | -0.01 | 0     | -0.03 | 0     | -0.03 |
| 210 | -0.02 | 0.06  | -0.03 | 0.02  | -0.02 | 0     | -0.02 | 0     | -0.03 | 0.06  | -0.02 | -0.04 | -0.02 | 0.02  | -0.03 | 0.02  |
| 211 | -0.02 | -0.07 | -0.03 | -0.03 | -0.03 | -0.03 | -0.03 | -0.02 | -0.03 | -0.06 | -0.02 | 0.01  | -0.03 | -0.04 | -0.03 | -0.03 |
| 212 | -0.52 | 0.15  | -0.65 | 0.06  | -0.71 | 0.08  | -0.74 | 0.15  | -0.72 | 0.12  | -0.47 | 0.08  | -0.57 | 0.06  | -0.5  | 0.08  |
| 213 | -0.11 | -0.18 | -0.11 | -0.09 | -0.1  | -0.12 | -0.12 | -0.15 | -0.09 | -0.13 | -0.08 | -0.08 | -0.11 | -0.05 | -0.11 | -0.09 |
| 214 | -2.11 | -0.43 | -2.11 | -1.58 | -2.12 | 0.09  | -2.63 | 2.3   | -1.5  | -2.85 | -1.58 | -0.06 | -1.66 | -1.38 | -2.36 | -0.37 |
| 215 | -0.43 | 0.22  | -0.36 | 0.21  | -0.37 | 0.21  | -0.33 | 0.05  | -0.4  | 0.21  | -0.53 | 0.51  | -0.42 | 0.07  | -0.38 | 0.13  |
| 216 | -3.33 | -0.06 | -3.68 | -0.34 | -2.65 | 0.57  | -2.74 | 0.19  | -3.63 | 0.88  | -3.84 | -0.31 | -3.4  | -1.53 | -2.76 | 0.52  |
| 217 | -5.49 | -3.63 | -6.65 | -2.32 | -6.04 | -4.9  | -5.98 | -4.49 | -6.7  | -3.88 | -6.86 | -1.91 | -5.86 | -1.37 | -6.59 | -3.95 |
| 218 | -0.89 | -4.72 | -1.04 | -4.15 | -1.64 | -3.27 | -1.23 | -1.29 | -1.5  | -2.68 | -1.2  | -2.17 | -1.92 | -2.93 | -1.48 | -2.77 |
| 219 | -2.63 | -1.72 | -2.22 | -0.16 | -2.94 | -0.75 | -1.26 | 0.1   | -1.06 | 0.21  | -0.87 | 0.04  | -3.03 | -0.26 | -1.93 | 0.08  |
| 220 | -0.33 | 0.25  | -0.29 | 0.05  | -0.33 | 0     | -0.16 | 0.15  | -0.15 | 0.04  | -0.13 | 0.08  | -0.19 | 0.02  | -0.22 | 0.01  |
| 221 | -1.19 | -0.39 | -1.6  | 0.16  | -1.65 | 0.23  | -0.79 | -0.24 | -0.8  | 0.04  | -0.57 | -0.05 | -1.69 | -0.16 | -1.34 | -0.15 |
| 222 | -0.06 | 0.07  | -0.08 | 0.02  | -0.08 | 0     | -0.05 | 0.06  | -0.05 | 0.07  | -0.04 | 0.01  | -0.08 | 0.05  | -0.08 | 0.03  |
| 223 | -0.03 | 0.02  | -0.04 | -0.01 | -0.04 | 0     | -0.03 | -0.02 | -0.03 | -0.02 | -0.02 | -0.01 | -0.03 | 0     | -0.04 | -0.01 |
| 224 | -0.02 | 0.01  | -0.02 | -0.02 | -0.03 | 0     | -0.02 | -0.03 | -0.02 | -0.04 | -0.02 | -0.02 | -0.02 | -0.01 | -0.02 | -0.02 |
| 225 | -0.01 | -0.02 | -0.01 | -0.02 | -0.01 | -0.01 | -0.01 | -0.02 | -0.01 | -0.03 | 0     | -0.01 | 0     | -0.01 | -0.01 | -0.02 |
| 226 | -0.01 | -0.03 | -0.01 | -0.02 | -0.01 | -0.01 | -0.01 | -0.02 | -0.01 | -0.03 | -0.01 | -0.01 | -0.01 | -0.02 | -0.01 | -0.02 |
| 227 | -0.03 | -0.01 | -0.03 | -0.02 | -0.02 | 0     | -0.02 | -0.04 | -0.02 | -0.04 | -0.02 | -0.01 | -0.02 | -0.02 | -0.03 | -0.02 |
| 228 | -0.01 | -0.01 | -0.01 | 0     | -0.01 | -0.01 | -0.01 | 0.01  | -0.01 | 0.01  | 0     | 0     | -0.01 | 0.01  | -0.01 | 0     |
| 229 | 0     | -0.01 | 0     | 0     | 0     | 0     | 0     | 0     | 0     | -0.01 | 0     | 0     | 0     | 0     | 0     | 0     |
| 230 | -0.01 | -0.02 | -0.01 | -0.01 | -0.01 | 0     | 0     | -0.02 | 0     | -0.02 | 0     | 0     | -0.01 | -0.02 | -0.01 | -0.01 |
| 231 | -0.02 | 0     | -0.02 | -0.01 | -0.02 | 0     | -0.01 | -0.02 | -0.01 | -0.02 | -0.01 | -0.01 | -0.01 | -0.01 | -0.02 | -0.01 |
| 232 | 0     | -0.01 | 0     | -0.01 | 0     | 0     | 0     | -0.01 | 0     | -0.01 | 0     | 0     | 0     | -0.01 | 0     | -0.01 |
| 233 | 0     | -0.02 | 0     | -0.01 | 0     | -0.01 | 0     | -0.02 | 0     | -0.02 | 0     | 0     | 0     | -0.02 | 0     | -0.01 |
| 234 | 0     | -0.01 | 0     | 0     | 0     | 0     | 0     | 0     | 0     | 0     | 0     | 0     | 0     | 0     | 0     | 0     |
| 235 | 0     | -0.01 | 0     | -0.01 | 0     | 0     | 0     | -0.01 | 0     | -0.01 | 0     | 0     | 0     | -0.01 | 0     | -0.01 |
| 236 | 0     | -0.01 | 0     | -0.01 | 0     | 0     | 0     | -0.01 | 0     | -0.01 | 0     | 0     | 0     | -0.01 | 0     | -0.01 |
| 237 | 0     | 0     | 0     | 0.01  | 0     | 0     | 0     | 0.01  | 0     | 0     | 0     | 0     | 0     | 0.01  | 0     | 0     |
| 238 | -0.03 | -0.04 | -0.02 | 0     | -0.02 | 0     | -0.02 | 0.01  | -0.02 | 0.01  | -0.03 | 0.01  | -0.03 | 0     | -0.03 | 0     |
| 239 | -0.01 | -0.04 | -0.01 | 0.02  | -0.01 | 0     | -0.01 | 0.02  | -0.01 | 0.01  | -0.01 | 0     | -0.01 | 0.02  | -0.01 | 0     |
| 240 | -0.01 | -0.06 | -0.01 | 0.02  | -0.01 | 0     | -0.01 | 0.03  | -0.01 | 0.01  | -0.01 | 0     | -0.01 | 0.02  | -0.01 | 0     |
| 241 | -0.02 | -0.07 | -0.01 | 0.02  | -0.01 | -0.01 | -0.01 | 0.03  | -0.01 | 0.01  | -0.02 | 0     | -0.01 | 0.02  | -0.02 | -0.01 |
| 242 | -0.03 | 0.02  | -0.02 | 0     | -0.03 | 0.02  | -0.02 | 0.01  | -0.02 | 0.03  | -0.03 | 0.02  | -0.03 | 0.02  | -0.03 | 0.03  |
| 243 | -0.26 | -0.07 | -0.18 | 0.06  | -0.19 | -0.01 | -0.17 | 0.05  | -0.17 | 0.04  | -0.28 | 0.01  | -0.24 | 0.04  | -0.28 | 0     |
| 244 | -0.1  | -0.1  | -0.07 | -0.02 | -0.08 | -0.01 | -0.06 | -0.03 | -0.06 | -0.03 | -0.08 | -0.01 | -0.08 | -0.03 | -0.09 | -0.03 |



|     |       |       |       |       |       |       |       |       |       |       |       |       |       |       |       |       |
|-----|-------|-------|-------|-------|-------|-------|-------|-------|-------|-------|-------|-------|-------|-------|-------|-------|
| 245 | -0.07 | -0.07 | -0.05 | 0.02  | -0.05 | 0.01  | -0.04 | 0.03  | -0.04 | 0.01  | -0.06 | 0     | -0.05 | 0.02  | -0.05 | 0     |
| 246 | -0.01 | 0     | -0.01 | 0.01  | -0.01 | 0     | -0.01 | 0.02  | -0.01 | 0.01  | -0.01 | 0     | -0.01 | 0.01  | -0.01 | 0.01  |
| 247 | 0     | 0     | 0     | 0.01  | 0     | 0     | 0     | 0.01  | 0     | 0     | 0     | 0     | 0     | 0.01  | 0     | 0     |
| 248 | 0     | 0.02  | 0     | 0.01  | 0     | 0     | 0     | 0.01  | 0     | 0.01  | 0     | 0     | 0     | 0.01  | 0     | 0.01  |
| 249 | 0     | 0.01  | 0     | 0.01  | 0     | 0     | 0     | 0.01  | 0     | 0.01  | 0     | 0     | 0     | 0.01  | 0     | 0     |
| 250 | 0     | 0     | 0     | 0     | 0     | 0     | 0     | 0     | 0     | 0     | 0     | 0     | 0     | 0     | 0     | 0     |
| 251 | 0     | -0.01 | 0     | -0.01 | 0     | 0     | 0     | -0.01 | 0     | -0.01 | 0     | 0     | 0     | -0.02 | 0     | -0.01 |
| 252 | 0     | 0     | 0     | 0.01  | 0     | 0     | 0     | 0.01  | 0     | 0.01  | 0     | 0     | 0     | 0.01  | 0     | 0.01  |
| 253 | 0     | -0.01 | 0     | 0     | 0     | 0     | 0     | 0     | 0     | 0     | 0     | 0     | 0     | 0     | 0     | 0     |
| 254 | 0     | -0.02 | 0     | -0.01 | 0     | 0     | 0     | -0.01 | 0     | -0.01 | 0     | 0     | 0     | -0.01 | 0     | -0.01 |
| 255 | 0     | 0.02  | 0     | 0.01  | 0     | 0     | 0     | 0.01  | 0     | 0.01  | 0     | 0     | 0     | 0.01  | 0     | 0.01  |
| 256 | 0     | -0.02 | 0     | 0     | 0     | 0     | 0     | 0     | 0     | 0     | 0     | 0     | 0     | -0.01 | 0     | 0     |
| 257 | -0.01 | -0.02 | -0.01 | -0.01 | -0.01 | -0.01 | 0     | -0.01 | -0.01 | -0.01 | 0     | 0     | -0.01 | -0.01 | -0.01 | -0.01 |
| 258 | 0     | 0.03  | 0     | 0.01  | 0     | 0.01  | 0     | 0.01  | 0     | 0.02  | 0     | 0     | 0     | 0.02  | 0     | 0.01  |
| 259 | -0.01 | 0     | -0.01 | 0     | -0.01 | 0     | -0.01 | 0     | -0.01 | 0     | -0.01 | 0     | -0.01 | -0.01 | -0.01 | 0     |
| 260 | 0     | 0.01  | 0     | 0.01  | 0     | 0     | 0     | 0     | 0     | 0.01  | 0     | 0     | 0     | 0.01  | 0     | 0.01  |
| 261 | 0     | 0     | 0     | 0     | 0     | 0     | 0     | 0.02  | 0     | 0     | 0     | 0.01  | 0     | 0     | 0     | 0.01  |
| 262 | 0     | 0     | 0     | 0     | 0     | 0     | 0     | 0.01  | 0     | 0.01  | 0     | 0     | 0     | 0     | 0     | 0     |
| 263 | 0     | 0     | 0     | 0     | 0     | 0     | 0     | 0     | 0     | 0     | 0     | 0     | 0     | 0     | 0     | 0     |
| 264 | 0     | -0.01 | 0     | 0     | 0     | 0     | 0     | 0.01  | 0     | 0     | 0     | 0.01  | 0     | 0     | 0     | 0     |
| 265 | 0     | -0.02 | 0     | -0.01 | 0     | 0     | 0     | 0     | 0     | -0.01 | 0     | 0     | 0     | -0.01 | 0     | 0     |
| 266 | 0     | -0.01 | 0     | 0     | 0     | 0     | 0     | 0     | 0     | 0     | 0     | 0     | 0     | 0     | 0     | 0     |
| 267 | 0     | -0.01 | 0     | -0.01 | 0     | -0.01 | 0     | -0.02 | 0     | -0.01 | 0     | -0.01 | 0     | -0.02 | 0     | -0.01 |
| 268 | -0.01 | -0.01 | -0.01 | 0     | -0.01 | 0     | -0.01 | 0     | -0.01 | 0     | 0     | 0     | -0.01 | 0     | -0.01 | 0     |
| 269 | 0     | 0.05  | 0     | 0.02  | 0     | 0.01  | 0     | 0.02  | 0     | 0.03  | 0     | 0     | 0     | 0.03  | 0     | 0.02  |
| 270 | 0     | 0.02  | 0     | 0.02  | 0     | 0.01  | 0     | 0.02  | 0     | 0.01  | 0     | 0.01  | 0     | 0.02  | 0     | 0.01  |
| 271 | 0     | 0.02  | 0     | 0.01  | 0     | 0     | 0     | 0     | 0     | 0.01  | 0     | 0     | 0     | 0.01  | 0     | 0.01  |
| 272 | -0.01 | 0.04  | -0.01 | 0.02  | -0.01 | 0.01  | -0.01 | 0.01  | -0.01 | 0.02  | -0.01 | 0.01  | -0.01 | 0.02  | -0.01 | 0.02  |
| 273 | -0.02 | 0     | -0.02 | 0.01  | -0.02 | 0     | -0.01 | 0.03  | -0.01 | 0.01  | -0.01 | 0.01  | -0.02 | 0.02  | -0.02 | 0.01  |
| 274 | -0.01 | 0.02  | -0.01 | 0     | -0.01 | 0.01  | -0.01 | 0     | -0.01 | 0.01  | -0.01 | 0     | -0.01 | 0     | -0.01 | 0.01  |
| 275 | -0.02 | -0.06 | -0.01 | -0.01 | -0.01 | -0.02 | -0.01 | -0.01 | -0.01 | -0.02 | -0.01 | -0.01 | -0.02 | -0.04 | -0.01 | -0.02 |
| 276 | -0.01 | 0.02  | 0     | 0.03  | 0     | 0.01  | 0     | 0.02  | 0     | 0.01  | 0     | 0.01  | 0     | 0.04  | 0     | 0.02  |
| 277 | -0.01 | -0.01 | -0.01 | 0.01  | -0.01 | -0.01 | 0     | 0     | -0.01 | 0     | -0.01 | 0     | -0.01 | 0     | -0.01 | 0     |
| 278 | 0     | -0.01 | 0     | 0     | 0     | 0     | 0     | 0     | 0     | 0     | 0     | 0     | 0     | 0     | 0     | 0     |
| 279 | 0     | -0.02 | 0     | -0.01 | 0     | 0     | 0     | -0.01 | 0     | -0.01 | 0     | 0     | 0     | -0.02 | 0     | -0.01 |
| 280 | 0     | 0     | 0     | 0     | 0     | 0     | 0     | 0     | 0     | 0     | 0     | 0     | 0     | 0     | 0     | 0     |
| 281 | 0     | 0     | 0     | 0.01  | 0     | 0     | 0     | 0.01  | 0     | 0.01  | 0     | 0     | 0     | 0.01  | 0     | 0.01  |
| 282 | 0     | 0.01  | 0     | -0.01 | 0     | 0     | 0     | -0.01 | 0     | 0     | 0     | 0     | 0     | -0.01 | 0     | 0     |
| 283 | 0     | 0.01  | 0     | 0     | 0     | 0     | 0     | 0     | 0     | 0     | 0     | 0     | 0     | 0     | 0     | 0     |
| 284 | 0     | 0     | 0     | 0     | 0     | 0     | 0     | -0.01 | 0     | -0.01 | 0     | 0     | 0     | -0.01 | 0     | 0     |
| 285 | 0     | -0.02 | 0     | -0.01 | 0     | -0.01 | 0     | -0.01 | 0     | -0.01 | 0     | 0     | 0     | -0.02 | 0     | -0.01 |
| 286 | -0.06 | -0.01 | -0.05 | -0.05 | -0.06 | -0.01 | -0.02 | 0     | -0.03 | -0.01 | -0.03 | 0     | -0.08 | -0.07 | -0.06 | -0.02 |
| 287 | -0.04 | -0.05 | -0.03 | 0.02  | -0.03 | -0.02 | -0.02 | 0.03  | -0.02 | -0.01 | -0.02 | 0.01  | -0.03 | 0.02  | -0.03 | 0     |
| 288 | -0.24 | 0.33  | -0.19 | 0.04  | -0.26 | 0     | -0.12 | -0.03 | -0.16 | 0.03  | -0.1  | 0.01  | -0.32 | -0.1  | -0.21 | 0     |
| 289 | -0.13 | -0.17 | -0.11 | 0.01  | -0.08 | -0.01 | -0.06 | -0.02 | -0.07 | -0.04 | -0.07 | 0.01  | -0.09 | 0     | -0.1  | -0.01 |



|    |       |        |       |        |       |       |       |        |       |        |
|----|-------|--------|-------|--------|-------|-------|-------|--------|-------|--------|
| 2  | 0     | -0.01  | 0     | -0.01  | 0     | -0.01 | 0     | 0      | 0     | -0.01  |
| 3  | 0     | 0.01   | 0     | 0.01   | 0     | 0.01  | 0     | 0      | 0     | 0.01   |
| 4  | 0     | -0.01  | 0     | 0      | 0     | 0     | 0     | -0.01  | 0     | -0.01  |
| 5  | 0     | 0.01   | 0     | 0      | 0     | 0     | 0     | 0.01   | 0     | 0.01   |
| 6  | 0     | 0      | 0     | 0.01   | 0     | 0     | 0     | -0.01  | 0     | 0      |
| 7  | 0     | -0.02  | 0     | -0.02  | 0     | -0.01 | 0     | 0.01   | 0     | -0.01  |
| 8  | -0.02 | 0.03   | -0.01 | 0.02   | -0.02 | 0.01  | -0.01 | -0.01  | -0.01 | 0.04   |
| 9  | -0.01 | -0.04  | -0.01 | -0.03  | -0.01 | -0.01 | -0.01 | 0.02   | -0.01 | -0.03  |
| 10 | -0.04 | 0      | -0.02 | 0.01   | -0.02 | 0     | -0.01 | 0      | -0.02 | -0.01  |
| 11 | -0.09 | 0.05   | -0.03 | 0      | -0.04 | 0.01  | -0.02 | 0      | -0.05 | -0.01  |
| 12 | -0.03 | 0      | -0.01 | 0.02   | -0.01 | 0.01  | -0.01 | -0.01  | -0.01 | -0.03  |
| 13 | -0.69 | -0.07  | -0.15 | 0.02   | -0.18 | 0.07  | -0.15 | -0.04  | -0.1  | 0.08   |
| 14 | -0.6  | 0.06   | -0.2  | -0.01  | -0.17 | 0.1   | -0.11 | 0.01   | -0.09 | -0.12  |
| 15 | -2.61 | 0.22   | -1.56 | 0.11   | -1.99 | 0.24  | -0.69 | 0.08   | -1.73 | -0.39  |
| 16 | -0.23 | -0.14  | -0.19 | -0.04  | -0.16 | 0     | -0.09 | 0.07   | -0.16 | -0.1   |
| 17 | -0.07 | 0.05   | -0.04 | 0.02   | -0.05 | 0.02  | -0.03 | -0.02  | -0.05 | 0.05   |
| 18 | -0.01 | -0.02  | -0.01 | -0.02  | -0.01 | 0     | -0.01 | 0.02   | -0.01 | -0.01  |
| 19 | -0.01 | -0.04  | 0     | -0.02  | 0     | -0.03 | 0     | -0.02  | 0     | -0.07  |
| 20 | 0     | 0      | 0     | 0      | 0     | 0.01  | 0     | 0.01   | 0     | 0.02   |
| 21 | 0     | -0.01  | 0     | -0.01  | 0     | -0.01 | 0     | 0      | 0     | -0.02  |
| 22 | 0     | 0      | 0     | 0      | 0     | 0     | 0     | 0      | 0     | 0.01   |
| 23 | 0     | -0.01  | 0     | 0      | 0     | 0     | 0     | 0      | 0     | 0      |
| 24 | 0     | 0      | 0     | 0      | 0     | 0     | 0     | 0      | 0     | 0      |
| 25 | 0     | -0.01  | 0     | -0.01  | 0     | -0.01 | 0     | 0      | 0     | -0.01  |
| 26 | 0     | 0.01   | 0     | 0.01   | 0     | 0.01  | 0     | 0      | 0     | 0.03   |
| 27 | 0     | -0.01  | 0     | -0.01  | 0     | -0.01 | 0     | 0.01   | 0     | -0.02  |
| 28 | 0     | 0.01   | 0     | 0.01   | 0     | 0.01  | 0     | 0.01   | 0     | 0.02   |
| 29 | -0.01 | 0      | -0.01 | 0      | -0.01 | -0.01 | -0.01 | -0.02  | -0.01 | -0.02  |
| 30 | -0.04 | 0.03   | -0.02 | 0.02   | -0.03 | 0.02  | -0.02 | 0.04   | -0.03 | 0.04   |
| 31 | -0.09 | 0.02   | -0.05 | 0.01   | -0.06 | 0.06  | -0.05 | -0.01  | -0.06 | 0.09   |
| 32 | -1.58 | 0.13   | -1.43 | 0.04   | -1.7  | -0.01 | -1.36 | -0.04  | -1.56 | 0.13   |
| 33 | -0.16 | 0.02   | -0.14 | 0.05   | -0.12 | 0.09  | -0.11 | 0.05   | -0.11 | 0.04   |
| 34 | -0.7  | -11.76 | -0.29 | -12.02 | -1.1  | -11.8 | -0.61 | -10.09 | -1.21 | -13.49 |
| 35 | -0.27 | 0.02   | -0.48 | 0.67   | -0.25 | 0.01  | -0.54 | 0.33   | -0.27 | 0.19   |
| 36 | -1.92 | 1      | -2.13 | 1.06   | -2.11 | 0.76  | -2.09 | 0.75   | -1.8  | 1.21   |
| 37 | -1.11 | 0.41   | -0.91 | 0.39   | -1.3  | 0.59  | -0.68 | 0.23   | -1.52 | 0.83   |
| 38 | -0.06 | -0.02  | -0.06 | -0.02  | -0.07 | 0     | -0.05 | -0.02  | -0.07 | 0      |
| 39 | -0.07 | -0.09  | -0.05 | -0.1   | -0.06 | -0.19 | -0.05 | -0.09  | -0.08 | -0.26  |
| 40 | -0.03 | 0.02   | -0.02 | 0.01   | -0.03 | 0     | -0.02 | -0.01  | -0.03 | 0.01   |
| 41 | -0.39 | -0.01  | -0.32 | -0.02  | -0.25 | 0.03  | -0.5  | -0.01  | -0.53 | 0      |
| 42 | -0.02 | 0      | -0.01 | 0      | -0.01 | -0.01 | -0.01 | -0.02  | -0.01 | -0.02  |
| 43 | -0.02 | -0.01  | -0.01 | -0.01  | -0.01 | -0.01 | -0.01 | -0.02  | -0.01 | -0.01  |
| 44 | 0     | 0.01   | 0     | 0      | 0     | 0.01  | 0     | 0.01   | 0     | 0.03   |
| 45 | 0     | 0.01   | 0     | 0      | 0     | 0.01  | 0     | 0.01   | 0     | 0.01   |



|     |       |       |       |       |       |       |       |       |       |       |
|-----|-------|-------|-------|-------|-------|-------|-------|-------|-------|-------|
| 91  | 0     | 0.01  | 0     | 0.01  | 0     | 0.01  | 0     | 0     | 0     | 0.01  |
| 92  | 0     | 0     | 0     | -0.01 | 0     | 0     | 0     | 0.01  | 0     | 0     |
| 93  | 0     | 0     | 0     | 0     | 0     | 0     | 0     | 0     | 0     | 0     |
| 94  | 0     | 0     | 0     | 0     | 0     | 0     | 0     | 0     | 0     | 0     |
| 95  | 0     | 0.01  | 0     | 0.01  | 0     | 0.01  | 0     | 0.01  | 0     | 0.02  |
| 96  | 0     | 0     | 0     | 0     | 0     | 0     | 0     | 0     | 0     | 0     |
| 97  | 0     | 0     | 0     | 0     | 0     | 0     | 0     | 0     | 0     | 0     |
| 98  | 0     | -0.01 | 0     | -0.01 | 0     | 0     | 0     | 0     | 0     | -0.01 |
| 99  | 0     | 0     | 0     | 0     | 0     | 0     | 0     | -0.01 | 0     | -0.01 |
| 100 | -0.01 | -0.01 | 0     | -0.01 | 0     | -0.01 | 0     | 0     | 0     | -0.01 |
| 101 | 0     | -0.02 | 0     | -0.01 | 0     | -0.02 | 0     | -0.01 | 0     | -0.04 |
| 102 | -0.01 | 0.02  | -0.01 | 0.02  | -0.01 | 0.03  | -0.01 | 0     | -0.01 | 0.05  |
| 103 | -0.02 | -0.01 | -0.01 | -0.01 | -0.01 | -0.01 | -0.01 | 0     | -0.01 | -0.01 |
| 104 | -0.01 | 0.01  | 0     | 0.01  | 0     | 0.01  | 0     | 0     | 0     | 0.02  |
| 105 | -0.02 | -0.01 | -0.01 | -0.01 | -0.01 | -0.01 | -0.02 | -0.03 | -0.02 | 0     |
| 106 | -0.01 | -0.01 | 0     | -0.01 | 0     | -0.01 | 0     | 0     | 0     | -0.01 |
| 107 | -0.01 | 0.02  | -0.01 | 0.02  | -0.01 | 0.04  | -0.01 | 0.05  | -0.01 | 0.01  |
| 108 | -0.04 | 0.05  | -0.02 | 0.03  | -0.03 | 0.07  | -0.04 | 0.09  | -0.03 | 0.05  |
| 109 | -0.02 | -0.01 | -0.01 | 0.03  | -0.02 | 0.01  | -0.02 | 0     | -0.02 | -0.02 |
| 110 | -0.1  | 0.05  | -0.07 | 0.05  | -0.08 | 0.09  | -0.1  | -0.02 | -0.09 | 0.23  |
| 111 | -1.33 | -0.16 | -1.08 | -0.1  | -1.58 | -0.17 | -1.46 | -0.13 | -1.32 | -0.12 |
| 112 | -0.15 | 0.09  | -0.08 | 0.01  | -0.09 | 0.05  | -0.13 | 0.1   | -0.09 | 0.08  |
| 113 | -0.11 | -0.05 | -0.07 | -0.01 | -0.09 | -0.01 | -0.09 | 0.02  | -0.07 | -0.06 |
| 114 | -1.85 | -0.25 | -2.09 | -0.05 | -3.49 | -0.09 | -3.32 | -0.07 | -3.33 | -0.03 |
| 115 | -0.63 | -0.11 | -0.27 | -0.06 | -0.3  | -0.09 | -0.52 | -0.08 | -0.45 | 0.02  |
| 116 | -0.08 | -0.04 | -0.04 | 0     | -0.05 | -0.01 | -0.05 | -0.03 | -0.06 | -0.05 |
| 117 | -0.18 | -0.01 | -0.08 | -0.02 | -0.1  | 0.02  | -0.1  | -0.02 | -0.14 | 0.02  |
| 118 | -0.59 | 0.08  | -0.16 | 0.09  | -0.67 | 0.03  | -0.18 | -0.09 | -0.46 | -0.13 |
| 119 | -0.13 | 0.05  | -0.06 | 0.04  | -0.08 | -0.01 | -0.05 | -0.07 | -0.16 | -0.09 |
| 120 | -1.93 | -0.1  | -1.29 | 0.03  | -1.84 | 0.16  | -1.44 | -0.01 | -2.02 | 0.01  |
| 121 | -0.07 | 0.02  | -0.04 | 0.01  | -0.05 | 0.02  | -0.05 | 0     | -0.06 | 0.06  |
| 122 | -0.13 | -0.03 | -0.08 | -0.02 | -0.08 | 0.07  | -0.08 | 0.06  | -0.09 | 0     |
| 123 | -1.55 | 0.18  | -2    | 0.09  | -1.69 | 0.17  | -1.72 | 0.09  | -1.82 | 0.24  |
| 124 | -0.09 | -0.08 | -0.08 | -0.07 | -0.07 | -0.06 | -0.07 | -0.04 | -0.08 | -0.1  |
| 125 | -0.06 | 0.14  | -0.06 | 0.15  | -0.06 | 0.22  | -0.05 | 0.14  | -0.07 | 0.29  |
| 126 | -0.05 | 0.09  | -0.05 | 0.09  | -0.05 | 0.13  | -0.04 | 0.07  | -0.05 | 0.16  |
| 127 | -0.03 | 0.01  | -0.02 | 0.02  | -0.02 | 0.08  | -0.02 | 0.04  | -0.03 | 0.11  |
| 128 | -0.02 | -0.04 | -0.02 | -0.05 | -0.02 | -0.08 | -0.02 | -0.02 | -0.02 | -0.11 |
| 129 | -0.01 | 0     | -0.01 | -0.02 | -0.01 | -0.04 | -0.01 | 0     | -0.01 | -0.05 |
| 130 | -0.01 | 0.01  | -0.01 | 0     | -0.01 | 0.02  | -0.01 | 0.02  | -0.01 | 0.04  |
| 131 | -0.2  | 0.04  | -0.17 | 0.01  | -0.19 | -0.02 | -0.13 | 0.03  | -0.22 | -0.01 |
| 132 | -0.02 | 0.05  | -0.02 | 0.04  | -0.02 | 0.06  | -0.01 | 0.01  | -0.02 | 0.07  |
| 133 | -0.05 | -0.01 | -0.03 | -0.01 | -0.04 | -0.02 | -0.02 | -0.02 | -0.04 | -0.02 |
| 134 | 0     | -0.01 | 0     | -0.01 | 0     | -0.01 | 0     | 0     | 0     | 0     |
| 135 | 0     | 0.01  | 0     | 0.02  | 0     | 0.04  | 0     | 0.01  | 0     | 0.07  |



|     |       |       |       |       |       |       |       |       |       |       |
|-----|-------|-------|-------|-------|-------|-------|-------|-------|-------|-------|
| 181 | 0     | 0     | 0     | 0     | 0     | 0     | 0     | 0     | 0     | 0     |
| 182 | 0     | 0.01  | 0     | 0     | 0     | 0     | 0     | 0.01  | 0     | 0.02  |
| 183 | 0     | 0     | 0     | 0     | 0     | 0     | 0     | 0     | 0     | -0.01 |
| 184 | 0     | 0     | 0     | 0     | 0     | 0     | 0     | 0     | 0     | 0.01  |
| 185 | 0     | -0.01 | 0     | -0.01 | 0     | -0.01 | 0     | 0     | 0     | -0.01 |
| 186 | 0     | 0     | 0     | 0.01  | 0     | 0.01  | 0     | 0     | 0     | 0.01  |
| 187 | -0.01 | 0.01  | -0.01 | 0     | 0     | 0.01  | 0     | 0.01  | 0     | 0.04  |
| 188 | -0.01 | 0.01  | -0.01 | -0.02 | 0     | -0.01 | 0     | 0.01  | -0.01 | -0.01 |
| 189 | -0.01 | 0     | -0.01 | 0     | -0.01 | 0     | -0.01 | 0     | -0.01 | 0.01  |
| 190 | -0.01 | 0     | -0.01 | -0.01 | -0.01 | 0     | -0.01 | 0.01  | -0.01 | 0     |
| 191 | -0.05 | -0.05 | -0.04 | -0.04 | -0.04 | -0.06 | -0.03 | -0.02 | -0.04 | -0.06 |
| 192 | -1.08 | -0.01 | -0.95 | 0.04  | -0.96 | 0.11  | -0.75 | 0.08  | -1.03 | 0.17  |
| 193 | -0.05 | 0.03  | -0.04 | 0.05  | -0.04 | 0.06  | -0.04 | 0.02  | -0.04 | 0.05  |
| 194 | -0.04 | 0     | -0.03 | -0.07 | -0.03 | -0.06 | -0.03 | 0     | -0.03 | -0.04 |
| 195 | -0.01 | 0     | -0.01 | 0.01  | -0.01 | 0     | -0.01 | -0.01 | -0.01 | -0.01 |
| 196 | 0     | -0.01 | 0     | -0.01 | 0     | -0.01 | 0     | 0     | 0     | -0.03 |
| 197 | 0     | 0     | 0     | 0     | 0     | 0     | 0     | 0     | 0     | 0     |
| 198 | 0     | 0     | 0     | 0     | 0     | 0     | 0     | 0     | 0     | -0.02 |
| 199 | 0     | 0     | 0     | -0.01 | 0     | 0     | 0     | 0.01  | 0     | 0.01  |
| 200 | 0     | 0     | 0     | 0     | 0     | 0     | 0     | 0     | 0     | -0.01 |
| 201 | -0.01 | 0     | -0.01 | -0.01 | -0.01 | 0     | -0.01 | 0     | -0.01 | 0     |
| 202 | 0     | 0     | 0     | 0     | 0     | 0     | 0     | 0     | 0     | 0     |
| 203 | 0     | 0     | 0     | 0     | 0     | 0     | 0     | 0     | 0     | -0.01 |
| 204 | 0     | 0     | 0     | 0     | 0     | 0     | 0     | 0     | 0     | -0.01 |
| 205 | 0     | 0     | 0     | 0     | 0     | 0     | 0     | 0     | 0     | 0.01  |
| 206 | 0     | 0     | 0     | 0.01  | 0     | 0     | 0     | -0.01 | 0     | 0.01  |
| 207 | 0     | 0     | 0     | 0     | 0     | 0     | 0     | 0     | 0     | 0     |
| 208 | 0     | 0.01  | 0     | 0     | 0     | 0.01  | 0     | 0.01  | 0     | 0.01  |
| 209 | 0     | 0     | 0     | -0.02 | 0     | -0.02 | 0     | 0     | 0     | -0.02 |
| 210 | -0.03 | -0.04 | -0.02 | 0.03  | -0.02 | 0     | -0.02 | -0.03 | -0.02 | -0.02 |
| 211 | -0.03 | 0.01  | -0.03 | -0.05 | -0.02 | -0.03 | -0.03 | 0.01  | -0.02 | 0     |
| 212 | -0.64 | 0.04  | -0.44 | 0.09  | -0.36 | 0.09  | -0.72 | 0.04  | -0.64 | 0.1   |
| 213 | -0.11 | -0.04 | -0.1  | -0.12 | -0.07 | -0.11 | -0.12 | -0.05 | -0.08 | -0.12 |
| 214 | -1.53 | -1.49 | -2.13 | -0.59 | -1.87 | 0.14  | -2.77 | -0.35 | -2    | -0.46 |
| 215 | -0.35 | 0.07  | -0.39 | 0.16  | -0.41 | 0.16  | -0.27 | 0.07  | -0.51 | 0.19  |
| 216 | -3.06 | -0.55 | -3.17 | -0.44 | -3.4  | 1.12  | -1.47 | 0.24  | -4.02 | -1.94 |
| 217 | -6.84 | -3.22 | -4.91 | -3.54 | -6.22 | -4.81 | -4.22 | -4.16 | -5.61 | -3.38 |
| 218 | -1.55 | -2.02 | -1.53 | -2.05 | -1.45 | -3.2  | -1.02 | -0.37 | -2.07 | -0.21 |
| 219 | -2.11 | 0.11  | -2.39 | -2.12 | -3.44 | -0.75 | -1.69 | 0.24  | -0.62 | -0.29 |
| 220 | -0.23 | 0.04  | -0.21 | 0.16  | -0.21 | 0.07  | -0.16 | -0.06 | -0.09 | 0.06  |
| 221 | -1.05 | -0.04 | -0.73 | 0.12  | -0.7  | 0.06  | -0.77 | 0.05  | -0.35 | -0.07 |
| 222 | -0.06 | -0.02 | -0.06 | 0.03  | -0.04 | 0     | -0.04 | -0.03 | -0.03 | 0.03  |
| 223 | -0.03 | 0     | -0.04 | 0     | -0.03 | 0     | -0.02 | -0.02 | -0.02 | -0.01 |
| 224 | -0.02 | 0     | -0.03 | 0     | -0.02 | 0     | -0.01 | -0.02 | -0.01 | -0.02 |
| 225 | 0     | 0     | -0.01 | -0.01 | 0     | -0.01 | 0     | -0.01 | 0     | -0.01 |

|     |       |       |       |       |       |       |       |       |       |       |
|-----|-------|-------|-------|-------|-------|-------|-------|-------|-------|-------|
| 226 | -0.01 | 0     | -0.01 | -0.02 | -0.01 | -0.01 | -0.01 | 0     | -0.01 | -0.01 |
| 227 | -0.02 | 0     | -0.02 | -0.01 | -0.01 | 0     | -0.02 | 0.02  | -0.01 | -0.02 |
| 228 | 0     | 0     | -0.01 | 0     | 0     | 0     | 0     | -0.03 | 0     | 0.01  |
| 229 | 0     | 0     | 0     | 0     | 0     | 0     | 0     | 0     | 0     | 0     |
| 230 | -0.01 | 0     | -0.01 | -0.01 | 0     | 0     | 0     | 0.01  | 0     | -0.01 |
| 231 | -0.01 | 0     | -0.02 | -0.01 | -0.01 | 0     | -0.01 | 0.01  | -0.01 | -0.01 |
| 232 | 0     | 0     | 0     | -0.01 | 0     | 0     | 0     | 0     | 0     | 0     |
| 233 | 0     | 0     | 0     | -0.01 | 0     | -0.01 | 0     | 0.01  | 0     | 0     |
| 234 | 0     | 0     | 0     | 0     | 0     | 0     | 0     | 0     | 0     | 0     |
| 235 | 0     | 0     | 0     | -0.01 | 0     | 0     | 0     | 0.01  | 0     | 0     |
| 236 | 0     | 0     | 0     | -0.01 | 0     | 0     | 0     | 0.02  | 0     | -0.01 |
| 237 | 0     | 0     | 0     | 0     | 0     | 0     | 0     | -0.01 | 0     | 0.01  |
| 238 | -0.02 | 0.01  | -0.03 | 0     | -0.02 | -0.01 | -0.02 | 0     | -0.01 | 0.01  |
| 239 | -0.01 | 0     | -0.01 | 0     | 0     | -0.01 | -0.01 | -0.04 | 0     | 0.03  |
| 240 | -0.01 | 0.01  | -0.01 | -0.01 | -0.01 | -0.01 | -0.01 | -0.06 | 0     | 0.04  |
| 241 | -0.01 | 0.01  | -0.02 | -0.01 | -0.01 | -0.01 | -0.02 | -0.06 | -0.01 | 0.06  |
| 242 | -0.02 | 0     | -0.03 | 0.03  | -0.02 | 0.01  | -0.04 | 0.04  | -0.01 | -0.04 |
| 243 | -0.18 | -0.01 | -0.33 | 0.02  | -0.24 | -0.02 | -0.7  | -0.09 | -0.05 | 0.01  |
| 244 | -0.08 | 0.01  | -0.13 | -0.03 | -0.07 | -0.02 | -0.2  | 0.01  | -0.03 | 0.01  |
| 245 | -0.05 | 0     | -0.06 | -0.01 | -0.03 | -0.01 | -0.04 | -0.05 | -0.02 | 0.04  |
| 246 | -0.01 | 0     | -0.01 | 0.01  | -0.01 | 0     | -0.01 | -0.01 | 0     | 0     |
| 247 | 0     | 0     | 0     | 0     | 0     | 0     | 0     | -0.01 | 0     | 0.01  |
| 248 | 0     | 0     | 0     | 0.01  | 0     | 0     | 0     | -0.01 | 0     | -0.01 |
| 249 | 0     | 0     | 0     | 0     | 0     | 0     | 0     | -0.01 | 0     | 0     |
| 250 | 0     | 0     | 0     | 0     | 0     | 0     | 0     | 0     | 0     | 0     |
| 251 | 0     | 0     | 0     | -0.01 | 0     | 0     | 0     | 0.01  | 0     | -0.01 |
| 252 | 0     | 0     | 0     | 0     | 0     | 0     | 0     | -0.01 | 0     | 0.01  |
| 253 | 0     | 0     | 0     | 0     | 0     | 0     | 0     | 0     | 0     | 0.01  |
| 254 | 0     | 0     | 0     | -0.01 | 0     | 0     | 0     | 0.01  | 0     | 0     |
| 255 | 0     | 0     | 0     | 0.01  | 0     | 0     | 0     | -0.01 | 0     | 0     |
| 256 | 0     | 0     | 0     | -0.01 | 0     | 0     | 0     | 0     | 0     | 0     |
| 257 | -0.01 | 0     | -0.01 | -0.01 | 0     | -0.01 | 0     | 0     | 0     | -0.01 |
| 258 | 0     | 0     | 0     | 0.02  | 0     | 0.01  | 0     | -0.01 | 0     | -0.01 |
| 259 | -0.01 | 0     | -0.01 | 0     | -0.01 | 0     | -0.01 | 0     | -0.01 | 0     |
| 260 | 0     | 0     | 0     | 0.01  | 0     | 0     | 0     | 0     | 0     | 0     |
| 261 | 0     | 0.01  | 0     | 0     | 0     | 0.01  | 0     | 0.01  | 0     | 0.02  |
| 262 | 0     | 0     | 0     | 0     | 0     | 0     | 0     | 0     | 0     | 0.01  |
| 263 | 0     | 0     | 0     | 0     | 0     | 0     | 0     | 0     | 0     | 0     |
| 264 | 0     | 0.01  | 0     | 0     | 0     | 0     | 0     | 0.01  | 0     | 0.02  |
| 265 | 0     | 0     | 0     | -0.01 | 0     | 0     | 0     | 0     | 0     | 0.01  |
| 266 | 0     | 0     | 0     | 0     | 0     | 0     | 0     | 0     | 0     | 0     |
| 267 | 0     | -0.01 | 0     | -0.01 | 0     | -0.01 | 0     | 0     | 0     | -0.02 |
| 268 | -0.01 | 0     | -0.01 | 0     | 0     | 0     | -0.01 | 0     | 0     | 0.01  |
| 269 | 0     | 0     | 0     | 0.03  | 0     | 0.01  | 0     | -0.01 | 0     | -0.01 |
| 270 | 0     | 0.01  | 0     | 0.01  | 0     | 0.01  | 0     | -0.01 | 0     | 0.01  |



|     |       |       |       |       |       |       |       |       |       |       |
|-----|-------|-------|-------|-------|-------|-------|-------|-------|-------|-------|
| 271 | 0     | 0.01  | 0     | 0     | 0     | 0.01  | 0     | 0     | 0     | 0     |
| 272 | -0.01 | 0.01  | -0.01 | 0.02  | -0.01 | 0.02  | -0.01 | 0     | 0     | -0.01 |
| 273 | -0.02 | 0     | -0.02 | 0     | -0.01 | 0     | -0.01 | -0.02 | -0.01 | 0.03  |
| 274 | -0.01 | 0     | -0.01 | 0.01  | -0.01 | 0.01  | -0.01 | 0.01  | 0     | -0.01 |
| 275 | -0.02 | 0.01  | -0.02 | -0.03 | -0.01 | -0.02 | -0.02 | 0     | -0.01 | 0.03  |
| 276 | -0.01 | 0.02  | -0.01 | 0     | 0     | 0.01  | -0.01 | -0.02 | 0     | 0.02  |
| 277 | -0.01 | 0.01  | -0.01 | -0.01 | -0.01 | 0     | -0.01 | -0.01 | 0     | 0.02  |
| 278 | 0     | 0     | 0     | 0     | 0     | 0     | 0     | 0     | 0     | 0     |
| 279 | 0     | 0     | 0     | -0.01 | 0     | 0     | 0     | 0.01  | 0     | 0     |
| 280 | 0     | 0     | 0     | 0     | 0     | 0     | 0     | 0.01  | 0     | -0.01 |
| 281 | 0     | 0.01  | 0     | 0     | 0     | 0     | 0     | -0.02 | 0     | 0.02  |
| 282 | 0     | -0.01 | 0     | 0     | 0     | 0     | 0     | 0.01  | 0     | -0.01 |
| 283 | 0     | 0     | 0     | 0.01  | 0     | 0     | 0     | 0     | 0     | -0.01 |
| 284 | 0     | 0     | 0     | 0     | 0     | 0     | 0     | 0.01  | 0     | -0.01 |
| 285 | 0     | -0.01 | 0     | -0.01 | 0     | -0.01 | 0     | 0.01  | 0     | 0     |
| 286 | -0.07 | 0.02  | -0.06 | -0.02 | -0.05 | 0     | -0.08 | -0.04 | -0.02 | 0.03  |
| 287 | -0.03 | 0     | -0.04 | -0.04 | -0.02 | -0.03 | -0.04 | -0.06 | -0.01 | 0.06  |
| 288 | -0.29 | 0.06  | -0.3  | 0.09  | -0.16 | 0.05  | -0.17 | 0.01  | -0.06 | -0.04 |
| 289 | -0.11 | 0.03  | -0.1  | -0.05 | -0.05 | -0.02 | -0.06 | -0.02 | -0.03 | 0.03  |
| 290 | -1.3  | 0     | -1.87 | 0.09  | -0.93 | 0.05  | -0.79 | 0.08  | -0.21 | -0.05 |
| 291 | -0.46 | -0.05 | -0.35 | -0.1  | -0.11 | -0.06 | -0.12 | -0.11 | -0.08 | 0.04  |
| 292 | -1.48 | 0.03  | -2.75 | -0.02 | -1.64 | 0.1   | -1.87 | -0.06 | -1.39 | -0.08 |
| 293 | -0.21 | 0.02  | -0.28 | -0.01 | -0.42 | -0.07 | -0.16 | 0.02  | -0.43 | -0.01 |
| 294 | -1.7  | -0.03 | -1.8  | -0.1  | -2.09 | -0.11 | -1.35 | -0.02 | -2.4  | -0.04 |
| 295 | -0.05 | -0.01 | -0.06 | 0.01  | -0.06 | 0     | -0.04 | 0     | -0.08 | 0.03  |
| 296 | -0.01 | 0     | -0.01 | 0     | -0.01 | 0     | -0.01 | -0.01 | -0.01 | 0     |
| 297 | -0.01 | 0.01  | -0.02 | 0     | -0.01 | 0     | -0.01 | 0     | -0.01 | 0.01  |
| 298 | -0.1  | 0.01  | -0.09 | -0.01 | -0.08 | -0.01 | -0.08 | 0.01  | -0.09 | 0.02  |
| 299 | -0.09 | 0.01  | -0.09 | -0.07 | -0.07 | -0.05 | -0.09 | -0.01 | -0.07 | -0.05 |
| 300 | -1.67 | 0.07  | -2.01 | -0.03 | -1.74 | 0.01  | -2.26 | 0.02  | -1.72 | 0.1   |
| 301 | -0.13 | -0.1  | -0.13 | 0.08  | -0.09 | -0.01 | -0.12 | -0.06 | -0.07 | -0.1  |
| 302 | -0.08 | -0.01 | -0.08 | -0.08 | -0.06 | -0.08 | -0.07 | -0.02 | -0.07 | 0.07  |
| 303 | -0.17 | -0.07 | -0.14 | -0.11 | -0.18 | -0.14 | -0.08 | -0.04 | -0.14 | -0.11 |
| 304 | -0.07 | -0.03 | -0.08 | -0.11 | -0.07 | -0.07 | -0.05 | 0.02  | -0.03 | 0.01  |
| 305 | -0.02 | 0.02  | -0.02 | -0.07 | -0.02 | -0.03 | -0.02 | 0.02  | -0.01 | 0.06  |
| 306 | -0.04 | 0.01  | -0.03 | -0.01 | -0.03 | 0.02  | -0.03 | -0.01 | -0.02 | 0.02  |
| 307 | -0.07 | -0.02 | -0.04 | -0.01 | -0.03 | -0.03 | -0.04 | -0.02 | -0.03 | 0.01  |
| 308 | 0     | 0     | 0     | -0.02 | 0     | -0.01 | 0     | 0.01  | 0     | 0.01  |
| 309 | -0.01 | -0.01 | -0.01 | -0.01 | 0     | -0.01 | 0     | 0     | 0     | -0.02 |
| 310 | 0     | 0.01  | 0     | 0.01  | 0     | 0     | 0     | 0     | 0     | 0.01  |
| 311 | -0.01 | -0.02 | -0.01 | -0.04 | -0.01 | -0.02 | -0.01 | 0     | 0     | -0.04 |
| 312 | 0     | 0     | 0     | 0.01  | 0     | 0.01  | 0     | 0     | 0     | 0     |
| 313 | -0.02 | -0.01 | -0.02 | -0.01 | -0.01 | 0     | -0.01 | 0     | -0.01 | 0     |
| 314 | 0     | 0.01  | 0     | 0.01  | 0     | 0.01  | 0     | 0     | 0     | 0.02  |
| 315 | -0.01 | 0.01  | -0.01 | 0.01  | -0.01 | 0.02  | 0     | 0.01  | -0.01 | 0.02  |

|     |       |       |       |       |   |       |   |       |   |       |
|-----|-------|-------|-------|-------|---|-------|---|-------|---|-------|
| 316 | 0     | 0     | 0     | 0     | 0 | -0.01 | 0 | 0     | 0 | -0.01 |
| 317 | 0     | 0.01  | 0     | 0.01  | 0 | 0.01  | 0 | 0     | 0 | 0.02  |
| 318 | 0     | 0.01  | 0     | 0.01  | 0 | 0.02  | 0 | 0.01  | 0 | 0.03  |
| 319 | 0     | 0     | 0     | -0.01 | 0 | 0     | 0 | 0     | 0 | 0     |
| 320 | -0.01 | 0.01  | -0.01 | 0.01  | 0 | 0.01  | 0 | 0.01  | 0 | 0.02  |
| 321 | 0     | -0.01 | 0     | 0     | 0 | -0.01 | 0 | -0.01 | 0 | -0.03 |
| 322 | 0     | 0     | 0     | -0.01 | 0 | -0.01 | 0 | 0     | 0 | 0     |
| 323 | 0     | -0.01 | 0     | 0     | 0 | 0     | 0 | 0     | 0 | -0.02 |
| 324 | 0     | -0.01 | 0     | -0.01 | 0 | -0.01 | 0 | 0     | 0 | -0.01 |
| 325 | 0     | 0.01  | 0     | 0     | 0 | 0     | 0 | 0     | 0 | 0.02  |
| 326 | 0     | 0     | 0     | 0     | 0 | 0     | 0 | 0     | 0 | -0.01 |
| 327 | 0     | 0     | 0     | 0     | 0 | 0     | 0 | 0     | 0 | -0.01 |

**Table S5.** Per-residue decomposition values (kcal/mol) for simulated inhibitor in CatD (Part 1).

| Residue | 1a    |       | 1b    |       | 1c    |       | 1d    |       | 2a    |       | 2b    |       | 2c    |       | 2d    |       |
|---------|-------|-------|-------|-------|-------|-------|-------|-------|-------|-------|-------|-------|-------|-------|-------|-------|
|         | Vvdw  | Vele  |
| 1       | 0     | 0.01  | 0     | 0.01  | 0     | 0.01  | 0     | 0     | 0     | 0.01  | 0     | 0     | 0     | 0.01  | 0     | 0     |
| 2       | 0     | -0.01 | 0     | -0.01 | 0     | -0.01 | 0     | 0     | 0     | -0.01 | 0     | 0     | 0     | -0.01 | 0     | -0.01 |
| 3       | 0     | 0     | 0     | 0.01  | 0     | 0.01  | 0     | 0     | 0     | 0.01  | 0     | 0     | 0     | 0.01  | 0     | 0     |
| 4       | 0     | -0.04 | 0     | 0     | 0     | -0.02 | 0     | 0     | 0     | 0     | 0     | 0.01  | 0     | -0.01 | 0     | -0.01 |
| 5       | 0     | -0.03 | 0     | -0.01 | 0     | -0.02 | 0     | 0     | 0     | -0.02 | 0     | 0.01  | 0     | -0.01 | 0     | -0.01 |
| 6       | -0.01 | 0.06  | -0.01 | 0.01  | -0.01 | 0.04  | -0.01 | 0.01  | -0.01 | 0.01  | -0.01 | -0.01 | -0.01 | 0.03  | -0.01 | 0.02  |
| 7       | -0.01 | -0.05 | -0.01 | -0.01 | -0.01 | -0.04 | -0.01 | 0.01  | -0.01 | -0.02 | -0.01 | 0.01  | -0.01 | -0.04 | -0.01 | 0     |
| 8       | -0.02 | -0.04 | -0.02 | 0     | -0.03 | -0.01 | -0.02 | -0.01 | -0.02 | 0.03  | -0.01 | 0     | -0.03 | -0.01 | -0.03 | -0.03 |
| 9       | -0.1  | 0     | -0.09 | 0.01  | -0.17 | 0     | -0.08 | 0.06  | -0.14 | 0.1   | -0.04 | 0.01  | -0.17 | -0.04 | -0.13 | 0.05  |
| 10      | -0.06 | 0.06  | -0.08 | 0.01  | -0.15 | 0.03  | -0.04 | 0.06  | -0.05 | 0.07  | -0.03 | 0.02  | -0.08 | -0.02 | -0.06 | 0.01  |
| 11      | -0.09 | 0.21  | -0.11 | 0.08  | -0.11 | 0.18  | -0.06 | 0.1   | -0.06 | 0.07  | -0.05 | 0.07  | -0.11 | 0.08  | -0.08 | 0.07  |
| 12      | -1.26 | -0.55 | -0.77 | 0.11  | -1.23 | -0.15 | -0.46 | 0.28  | -0.56 | 0.15  | -0.24 | 0.09  | -1.45 | -0.3  | -0.84 | 0.41  |
| 13      | -1.35 | 0.43  | -0.59 | 0.14  | -1.5  | 0.27  | -1.05 | 0.38  | -1.62 | -2.18 | -0.42 | 0.09  | -1.56 | -1.25 | -2    | 0.49  |
| 14      | -0.17 | -0.05 | -0.12 | -0.02 | -0.14 | -0.04 | -0.14 | 0     | -0.15 | -0.04 | -0.1  | 0     | -0.19 | -0.03 | -0.17 | -0.04 |
| 15      | -0.07 | 0.05  | -0.05 | 0     | -0.06 | 0.03  | -0.06 | -0.01 | -0.09 | 0.05  | -0.05 | -0.02 | -0.08 | 0.02  | -0.08 | -0.02 |
| 16      | -0.01 | -0.06 | -0.01 | 0     | -0.01 | -0.03 | -0.01 | -0.01 | -0.01 | 0     | -0.01 | 0.01  | -0.01 | -0.02 | -0.01 | -0.01 |
| 17      | 0     | 0.01  | 0     | 0     | 0     | 0     | 0     | 0     | -0.01 | -0.01 | 0     | 0     | 0     | 0     | 0     | 0     |
| 18      | -0.01 | -0.01 | -0.01 | 0     | -0.01 | 0     | -0.01 | 0     | -0.01 | 0.01  | -0.01 | 0     | -0.01 | 0     | -0.01 | 0     |
| 19      | 0     | -0.01 | 0     | -0.01 | 0     | -0.02 | 0     | 0     | 0     | -0.01 | 0     | 0     | 0     | -0.01 | 0     | -0.01 |
| 20      | 0     | 0     | 0     | 0     | 0     | 0     | 0     | 0     | 0     | 0     | 0     | 0     | 0     | 0     | 0     | 0     |
| 21      | 0     | -0.01 | 0     | -0.01 | 0     | -0.01 | 0     | 0     | 0     | 0     | 0     | 0     | 0     | -0.01 | 0     | -0.01 |
| 22      | 0     | 0.01  | 0     | 0     | 0     | 0     | 0     | 0     | 0     | 0     | 0     | 0     | 0     | 0     | 0     | 0     |
| 23      | 0     | -0.01 | 0     | 0     | 0     | 0     | 0     | 0     | 0     | 0     | 0     | 0     | 0     | 0     | 0     | 0     |
| 24      | 0     | 0.01  | 0     | 0     | 0     | 0.01  | 0     | 0     | 0     | 0.01  | 0     | 0     | 0     | 0.01  | 0     | 0     |
| 25      | 0     | -0.02 | 0     | 0     | 0     | -0.01 | 0     | 0     | 0     | 0     | 0     | 0.01  | 0     | 0     | 0     | 0     |
| 26      | 0     | 0.02  | 0     | 0.01  | 0     | 0.02  | 0     | 0     | 0     | 0.01  | 0     | 0     | 0     | 0.02  | 0     | 0.01  |
| 27      | -0.01 | 0.04  | -0.01 | 0     | -0.01 | 0.01  | -0.01 | 0.01  | -0.01 | 0     | -0.01 | -0.01 | -0.01 | 0.01  | -0.01 | 0.01  |

|    |       |       |       |       |       |       |       |       |       |       |       |       |       |       |       |       |
|----|-------|-------|-------|-------|-------|-------|-------|-------|-------|-------|-------|-------|-------|-------|-------|-------|
| 28 | -0.02 | 0.02  | -0.01 | 0.02  | -0.02 | 0.04  | -0.02 | -0.01 | -0.02 | 0.02  | -0.01 | 0.01  | -0.02 | 0.04  | -0.02 | 0.01  |
| 29 | -0.06 | 0.09  | -0.04 | 0     | -0.04 | 0.05  | -0.05 | -0.02 | -0.06 | 0.02  | -0.04 | -0.04 | -0.06 | 0.03  | -0.06 | -0.02 |
| 30 | -0.97 | 0.1   | -0.59 | -0.02 | -0.46 | 0.06  | -0.9  | 0.03  | -1.08 | -0.04 | -0.62 | -0.01 | -0.9  | 0.11  | -0.94 | 0.01  |
| 31 | -0.12 | -0.08 | -0.08 | -0.01 | -0.07 | -0.03 | -0.11 | -0.01 | -0.1  | 0     | -0.09 | 0     | -0.11 | -0.06 | -0.1  | 0.01  |
| 32 | -2.14 | 0.34  | -2.07 | 0.44  | -1.92 | 0.4   | -0.92 | -2.44 | -2.29 | 0.12  | -1.73 | -1.63 | -2.67 | 0.7   | -2.02 | 0.04  |
| 33 | -0.24 | 0.12  | -0.21 | 0.13  | -0.2  | 0     | -0.32 | 0     | -0.24 | 0.13  | -0.37 | 0.01  | -0.25 | 0.14  | -0.21 | 0.04  |
| 34 | -1.83 | 0.93  | -1.82 | 0     | -1.59 | 0.5   | -2.2  | -0.04 | -1.96 | 0.42  | -2.39 | 0.11  | -2.06 | -0.2  | -1.71 | -0.36 |
| 35 | -1.28 | 0.05  | -0.76 | -0.01 | -0.87 | 0     | -1.35 | -0.02 | -1.05 | 0.11  | -1.69 | -0.04 | -1.17 | -0.09 | -0.85 | 0.12  |
| 36 | -0.08 | -0.01 | -0.06 | 0     | -0.06 | 0     | -0.08 | -0.01 | -0.07 | 0.01  | -0.11 | -0.04 | -0.07 | -0.01 | -0.06 | 0.01  |
| 37 | -0.08 | -0.09 | -0.06 | -0.1  | -0.05 | -0.13 | -0.07 | 0.02  | -0.07 | -0.14 | -0.09 | 0.03  | -0.07 | -0.09 | -0.06 | -0.07 |
| 38 | -0.03 | 0.04  | -0.02 | 0.01  | -0.02 | 0.02  | -0.03 | 0     | -0.03 | 0     | -0.03 | -0.01 | -0.03 | 0.02  | -0.02 | 0     |
| 39 | -0.21 | 0.04  | -0.17 | -0.02 | -0.21 | -0.04 | -0.27 | 0.02  | -0.27 | -0.04 | -0.21 | -0.02 | -0.21 | -0.05 | -0.25 | 0     |
| 40 | -0.01 | 0.02  | -0.01 | 0     | -0.01 | 0     | -0.01 | 0.01  | -0.02 | 0     | -0.01 | 0     | -0.01 | 0.02  | -0.01 | 0.01  |
| 41 | -0.01 | 0.02  | -0.01 | -0.01 | -0.01 | -0.01 | -0.01 | 0.01  | -0.01 | -0.01 | -0.01 | -0.01 | -0.01 | -0.02 | -0.01 | -0.01 |
| 42 | 0     | 0     | 0     | 0     | 0     | 0     | 0     | 0     | 0     | 0     | 0     | 0     | 0     | 0     | 0     | 0     |
| 43 | 0     | 0     | 0     | 0     | 0     | 0     | 0     | 0     | 0     | 0     | 0     | 0     | 0     | 0.01  | 0     | 0     |
| 44 | 0     | 0.02  | 0     | 0     | 0     | 0.01  | 0     | 0     | 0     | 0.01  | 0     | -0.01 | 0     | 0.01  | 0     | 0     |
| 45 | 0     | 0.04  | 0     | -0.01 | 0     | 0     | 0     | 0     | 0     | 0     | 0     | -0.02 | 0     | -0.01 | 0     | -0.01 |
| 46 | 0     | -0.03 | 0     | -0.01 | 0     | -0.02 | 0     | -0.01 | 0     | -0.01 | 0     | 0.01  | 0     | -0.01 | 0     | -0.01 |
| 47 | 0     | -0.02 | 0     | 0     | 0     | -0.01 | 0     | -0.01 | 0     | 0     | 0     | 0     | 0     | 0     | 0     | -0.01 |
| 48 | 0     | -0.01 | 0     | 0     | 0     | 0     | 0     | -0.01 | 0     | -0.01 | 0     | 0     | 0     | 0     | 0     | -0.01 |
| 49 | -0.01 | -0.02 | -0.01 | 0     | -0.01 | -0.01 | -0.01 | 0     | -0.01 | 0     | -0.01 | 0.02  | -0.01 | 0     | -0.01 | -0.01 |
| 50 | -0.01 | -0.01 | -0.01 | -0.01 | -0.01 | -0.01 | -0.01 | 0     | -0.01 | 0     | 0     | 0     | -0.01 | -0.02 | -0.01 | -0.01 |
| 51 | -0.01 | 0.02  | -0.01 | -0.02 | -0.02 | -0.01 | -0.01 | 0.01  | -0.02 | 0.01  | -0.01 | -0.01 | -0.01 | -0.03 | -0.02 | -0.03 |
| 52 | 0     | 0.02  | 0     | -0.01 | -0.01 | -0.01 | 0     | 0.01  | -0.01 | 0     | 0     | -0.01 | 0     | -0.02 | -0.01 | -0.01 |
| 53 | 0     | 0.01  | 0     | -0.01 | -0.01 | 0     | 0     | 0.01  | -0.01 | 0     | 0     | 0     | 0     | -0.01 | 0     | 0     |
| 54 | -0.01 | -0.01 | -0.01 | -0.01 | -0.01 | -0.01 | -0.01 | 0     | -0.01 | 0     | -0.01 | 0     | -0.01 | -0.01 | -0.01 | -0.02 |
| 55 | -0.02 | -0.06 | -0.02 | -0.02 | -0.03 | -0.02 | -0.02 | -0.03 | -0.05 | 0     | -0.02 | 0     | -0.02 | -0.04 | -0.03 | -0.06 |
| 56 | 0     | 0.01  | 0     | 0.01  | -0.01 | 0.02  | 0     | -0.01 | -0.01 | 0     | 0     | 0     | 0     | 0.02  | -0.01 | 0.01  |
| 57 | 0     | 0     | 0     | 0     | 0     | 0     | 0     | 0     | 0     | 0     | 0     | 0     | 0     | 0     | 0     | -0.01 |
| 58 | 0     | 0.01  | 0     | 0     | 0     | 0.01  | 0     | 0     | 0     | 0     | 0     | 0     | 0     | 0.01  | 0     | 0     |
| 59 | 0     | 0     | 0     | 0     | 0     | 0     | 0     | 0     | 0     | 0     | 0     | 0     | 0     | 0     | 0     | -0.01 |
| 60 | 0     | 0     | 0     | 0     | 0     | 0     | 0     | 0     | 0     | 0     | 0     | 0     | 0     | 0     | 0     | 0     |
| 61 | 0     | 0.01  | 0     | 0     | 0     | 0.01  | 0     | 0     | 0     | 0     | 0     | 0     | 0     | 0     | 0     | 0     |
| 62 | 0     | 0.01  | 0     | 0     | 0     | 0     | 0     | 0     | 0     | 0     | 0     | 0     | 0     | 0     | 0     | 0     |
| 63 | 0     | 0     | 0     | 0     | 0     | 0     | 0     | 0     | 0     | 0     | 0     | 0     | 0     | 0     | 0     | 0     |
| 64 | 0     | 0     | 0     | 0     | 0     | 0     | 0     | 0     | 0     | 0     | 0     | 0     | 0     | 0     | 0     | 0     |
| 65 | 0     | 0     | 0     | 0     | 0     | 0     | 0     | 0     | 0     | 0     | 0     | 0     | 0     | 0     | 0     | 0     |
| 66 | 0     | 0.02  | 0     | 0     | 0     | 0.01  | 0     | 0     | 0     | 0.01  | 0     | -0.01 | 0     | 0     | 0     | 0     |
| 67 | 0     | -0.01 | 0     | 0     | 0     | -0.01 | 0     | 0     | 0     | 0     | 0     | 0     | 0     | 0     | 0     | 0     |
| 68 | 0     | 0     | 0     | -0.01 | 0     | -0.01 | 0     | 0     | 0     | 0     | 0     | 0     | 0     | -0.01 | 0     | -0.01 |
| 69 | 0     | 0.01  | 0     | 0.01  | 0     | 0.02  | 0     | 0     | 0     | 0.01  | 0     | 0     | 0     | 0.02  | 0     | 0.01  |
| 70 | 0     | 0.01  | 0     | 0.01  | 0     | 0.01  | 0     | 0     | 0     | 0.01  | 0     | 0     | 0     | 0.01  | 0     | 0.01  |
| 71 | 0     | -0.01 | 0     | 0     | 0     | 0     | 0     | 0     | 0     | 0     | 0     | 0     | 0     | 0     | 0     | 0     |
| 72 | 0     | 0.01  | 0     | -0.02 | 0     | -0.02 | 0     | 0     | 0     | -0.02 | 0     | -0.01 | 0     | -0.03 | 0     | -0.02 |

|     |       |       |       |       |       |       |       |       |       |       |       |       |       |       |       |       |
|-----|-------|-------|-------|-------|-------|-------|-------|-------|-------|-------|-------|-------|-------|-------|-------|-------|
| 73  | -0.02 | -0.01 | -0.02 | 0     | -0.02 | 0     | -0.02 | -0.01 | -0.02 | 0     | -0.02 | 0     | -0.02 | 0     | -0.02 | -0.01 |
| 74  | -0.03 | 0.03  | -0.02 | 0.01  | -0.02 | 0.01  | -0.02 | 0.01  | -0.02 | 0.01  | -0.04 | 0     | -0.02 | 0.01  | -0.02 | 0.02  |
| 75  | -0.2  | 0     | -0.15 | 0.03  | -0.17 | 0.04  | -0.18 | -0.03 | -0.18 | 0.02  | -0.27 | 0.01  | -0.18 | 0.05  | -0.16 | 0.04  |
| 76  | -0.68 | -0.11 | -0.51 | -0.48 | -0.73 | -0.63 | -0.53 | 0.01  | -0.55 | -0.47 | -1.38 | -0.15 | -0.6  | -0.55 | -0.53 | -0.55 |
| 77  | -5.88 | -1.84 | -6.05 | -2.49 | -7.18 | -2.87 | -6.06 | -1.88 | -6.87 | -2.52 | -7.95 | -2.08 | -5.71 | -2.69 | -6.45 | -2.78 |
| 78  | -2.72 | -2.98 | -4.32 | -3.14 | -5.06 | -2.65 | -4.71 | -2.53 | -5.07 | -3.1  | -4.11 | -2.06 | -3.98 | -3.45 | -4.65 | -3.98 |
| 79  | -6.05 | 0.38  | -5.69 | -1.9  | -5.83 | -1.95 | -6.52 | -0.42 | -6.05 | -2.84 | -1.4  | -0.56 | -4.73 | -4.11 | -6.43 | -1.06 |
| 80  | -0.46 | 0.08  | -0.52 | 0.37  | -0.68 | 0.45  | -0.57 | 0.18  | -0.7  | 0.51  | -0.47 | 0.07  | -0.53 | 0.35  | -0.52 | 0.41  |
| 81  | -0.11 | -0.04 | -0.11 | 0.03  | -0.15 | -0.01 | -0.12 | -0.05 | -0.15 | -0.02 | -0.15 | 0.01  | -0.11 | 0.03  | -0.12 | 0.03  |
| 82  | -0.11 | 0.03  | -0.1  | 0.07  | -0.14 | 0.07  | -0.13 | 0.02  | -0.15 | 0.05  | -0.14 | 0.03  | -0.11 | 0.09  | -0.11 | 0.08  |
| 83  | -0.01 | -0.03 | -0.01 | 0.03  | -0.01 | 0.02  | -0.01 | -0.01 | -0.01 | 0.02  | -0.01 | 0.01  | -0.01 | 0.04  | -0.01 | 0.03  |
| 84  | 0     | 0.01  | 0     | 0.02  | 0     | 0.02  | 0     | 0     | 0     | 0.01  | 0     | 0     | 0     | 0.02  | 0     | 0.02  |
| 85  | 0     | -0.02 | 0     | 0     | 0     | -0.01 | 0     | 0     | 0     | 0     | 0     | 0     | 0     | -0.01 | 0     | -0.01 |
| 86  | 0     | 0.01  | 0     | 0.01  | 0     | 0.01  | 0     | 0     | 0     | 0.01  | 0     | 0     | 0     | 0.01  | 0     | 0.01  |
| 87  | 0     | 0.01  | 0     | 0     | 0     | 0     | 0     | 0     | 0     | 0     | 0     | 0     | 0     | 0.01  | 0     | 0.01  |
| 88  | 0     | 0     | 0     | 0.01  | 0     | 0.01  | 0     | 0     | 0     | 0.01  | 0     | 0     | 0     | 0.01  | 0     | 0     |
| 89  | 0     | -0.01 | 0     | 0     | 0     | -0.01 | 0     | 0     | 0     | -0.01 | 0     | 0     | 0     | 0     | 0     | 0     |
| 90  | 0     | -0.01 | 0     | 0     | 0     | 0     | 0     | 0     | 0     | 0     | 0     | 0     | 0     | 0     | 0     | 0     |
| 91  | 0     | 0.02  | 0     | 0     | 0     | 0.01  | 0     | 0     | 0     | 0     | 0     | -0.01 | 0     | 0.01  | 0     | 0     |
| 92  | 0     | -0.02 | 0     | -0.01 | 0     | -0.01 | 0     | 0     | 0     | -0.01 | 0     | 0.01  | 0     | -0.01 | 0     | 0     |
| 93  | 0     | 0.02  | 0     | 0     | 0     | 0.01  | 0     | 0     | 0     | 0     | 0     | 0     | 0     | 0.01  | 0     | 0.01  |
| 94  | 0     | 0.01  | 0     | 0     | 0     | 0.01  | 0     | 0     | 0     | 0     | 0     | 0     | 0     | 0.01  | 0     | 0.01  |
| 95  | 0     | 0.02  | 0     | 0.01  | 0     | 0.01  | 0     | 0     | 0     | 0     | 0     | 0     | 0     | 0.01  | 0     | 0.01  |
| 96  | 0     | 0.03  | 0     | 0.01  | 0     | 0.02  | 0     | 0     | 0     | 0.01  | 0     | 0     | 0     | 0.02  | 0     | 0.01  |
| 97  | 0     | 0     | 0     | 0     | 0     | 0     | 0     | 0     | 0     | 0     | 0     | 0     | 0     | 0     | 0     | 0     |
| 98  | 0     | 0.02  | 0     | 0.01  | 0     | 0.02  | 0     | 0     | 0     | 0.01  | 0     | 0     | 0     | 0.01  | 0     | 0.01  |
| 99  | 0     | -0.01 | 0     | 0     | 0     | 0     | 0     | 0     | 0     | 0     | 0     | 0     | 0     | 0     | 0     | 0     |
| 100 | 0     | 0.01  | 0     | 0.01  | 0     | 0.01  | 0     | 0     | 0     | 0.01  | 0     | 0     | 0     | 0.01  | 0     | 0     |
| 101 | 0     | 0     | 0     | 0.01  | 0     | 0     | 0     | 0     | 0     | 0.01  | 0     | 0     | 0     | 0.01  | 0     | 0     |
| 102 | 0     | 0     | 0     | -0.01 | 0     | -0.01 | 0     | 0     | 0     | -0.01 | 0     | 0     | 0     | -0.01 | 0     | 0     |
| 103 | 0     | 0     | 0     | 0     | 0     | 0     | 0     | 0     | 0     | 0     | 0     | 0     | 0     | 0     | 0     | 0     |
| 104 | 0     | 0.03  | 0     | 0.01  | 0     | 0.02  | 0     | 0     | 0     | 0.02  | 0     | -0.01 | 0     | 0.01  | 0     | 0.01  |
| 105 | 0     | -0.02 | 0     | -0.02 | 0     | -0.03 | 0     | 0     | 0     | -0.02 | 0     | 0     | 0     | -0.02 | 0     | -0.02 |
| 106 | -0.01 | 0.05  | -0.01 | 0.01  | -0.01 | 0.03  | -0.01 | 0     | -0.01 | 0.02  | -0.01 | -0.01 | -0.01 | 0.02  | -0.01 | 0.01  |
| 107 | -0.01 | -0.02 | 0     | -0.01 | 0     | -0.02 | 0     | 0     | -0.01 | -0.01 | -0.01 | 0     | 0     | -0.02 | 0     | -0.02 |
| 108 | 0     | 0.02  | 0     | 0     | 0     | 0.01  | 0     | 0.01  | -0.01 | 0     | 0     | 0     | 0     | 0.01  | 0     | 0.01  |
| 109 | -0.01 | 0.02  | -0.01 | -0.02 | -0.01 | -0.01 | -0.01 | 0     | -0.01 | -0.01 | -0.01 | -0.02 | -0.01 | -0.03 | -0.01 | -0.02 |
| 110 | 0     | 0.02  | 0     | -0.01 | 0     | 0     | 0     | 0     | -0.01 | 0     | 0     | -0.01 | 0     | -0.01 | 0     | -0.01 |
| 111 | -0.01 | -0.02 | -0.01 | 0     | -0.01 | -0.01 | -0.01 | 0.01  | -0.01 | 0     | -0.01 | 0.02  | -0.01 | 0     | -0.01 | 0.01  |
| 112 | -0.03 | -0.14 | -0.03 | -0.05 | -0.06 | -0.07 | -0.04 | -0.05 | -0.07 | -0.04 | -0.04 | 0.03  | -0.04 | -0.08 | -0.05 | -0.06 |
| 113 | -0.03 | -0.06 | -0.03 | 0.06  | -0.05 | 0.03  | -0.03 | -0.03 | -0.04 | 0     | -0.03 | 0.04  | -0.03 | 0.09  | -0.03 | 0.08  |
| 114 | -0.02 | -0.02 | -0.02 | -0.02 | -0.04 | -0.02 | -0.02 | 0.01  | -0.04 | 0     | -0.01 | 0.02  | -0.02 | -0.03 | -0.03 | -0.03 |
| 115 | -0.08 | -0.04 | -0.1  | -0.06 | -0.27 | -0.08 | -0.1  | -0.03 | -0.27 | -0.05 | -0.05 | -0.01 | -0.08 | -0.08 | -0.17 | -0.14 |
| 116 | -0.54 | -0.05 | -1.11 | -0.12 | -2.55 | -0.28 | -1.34 | -0.04 | -3.08 | -0.21 | -0.91 | -0.11 | -1.1  | -0.32 | -1.59 | -0.68 |
| 117 | -0.65 | -0.04 | -1.17 | -0.07 | -1.58 | -0.2  | -1.36 | -0.08 | -2.07 | -0.26 | -1.42 | -0.16 | -1.64 | -0.34 | -1.69 | 0     |

|     |       |       |       |       |       |       |       |       |       |       |       |       |       |       |       |       |
|-----|-------|-------|-------|-------|-------|-------|-------|-------|-------|-------|-------|-------|-------|-------|-------|-------|
| 118 | -0.03 | -0.03 | -0.04 | -0.01 | -0.09 | -0.01 | -0.05 | 0.02  | -0.12 | 0.03  | -0.03 | 0.02  | -0.04 | -0.04 | -0.1  | -0.03 |
| 119 | -0.05 | 0.06  | -0.06 | -0.02 | -0.32 | -0.12 | -0.21 | -0.12 | -0.54 | -0.04 | -0.03 | 0.02  | -0.07 | 0.02  | -0.67 | -0.35 |
| 120 | -0.17 | 0.29  | -0.12 | 0.03  | -0.23 | 0.04  | -0.19 | 0.04  | -0.82 | -0.01 | -0.15 | 0     | -0.19 | 0.08  | -0.65 | 0.05  |
| 121 | -0.06 | 0.17  | -0.04 | 0.03  | -0.08 | 0.07  | -0.06 | 0.06  | -0.13 | -0.03 | -0.04 | 0     | -0.07 | 0.04  | -0.11 | 0.1   |
| 122 | -1.23 | 0.13  | -0.83 | 0.05  | -1.6  | -0.03 | -1.74 | 0.1   | -1.58 | -0.02 | -1.12 | -0.04 | -1.21 | 0.08  | -2.04 | -0.1  |
| 123 | -0.03 | -0.04 | -0.03 | 0.01  | -0.04 | 0.02  | -0.04 | -0.02 | -0.05 | 0.01  | -0.03 | 0.01  | -0.03 | 0.01  | -0.04 | 0     |
| 124 | -0.09 | -0.09 | -0.07 | 0     | -0.07 | -0.03 | -0.11 | -0.03 | -0.11 | 0.01  | -0.07 | 0.02  | -0.08 | -0.09 | -0.11 | -0.04 |
| 125 | -1.45 | 0.07  | -1.38 | 0.05  | -1.46 | 0.15  | -2.55 | -0.03 | -2.09 | 0.12  | -1.85 | -0.03 | -1.54 | 0.04  | -1.89 | 0.02  |
| 126 | -0.08 | -0.04 | -0.06 | -0.03 | -0.05 | -0.08 | -0.09 | 0.02  | -0.07 | -0.04 | -0.07 | 0.01  | -0.08 | -0.04 | -0.08 | -0.03 |
| 127 | -0.07 | 0.1   | -0.05 | 0.13  | -0.04 | 0.14  | -0.07 | -0.01 | -0.05 | 0.18  | -0.06 | 0     | -0.06 | 0.12  | -0.05 | 0.12  |
| 128 | -0.05 | 0.04  | -0.04 | 0.09  | -0.04 | 0.07  | -0.05 | -0.02 | -0.05 | 0.11  | -0.05 | -0.01 | -0.05 | 0.07  | -0.04 | 0.07  |
| 129 | -0.06 | -0.03 | -0.04 | 0.09  | -0.04 | 0.05  | -0.06 | 0.01  | -0.05 | 0.09  | -0.09 | 0.01  | -0.05 | 0.1   | -0.04 | 0.06  |
| 130 | -0.03 | -0.05 | -0.02 | -0.04 | -0.02 | -0.06 | -0.02 | 0.01  | -0.02 | -0.06 | -0.04 | 0.02  | -0.02 | -0.05 | -0.02 | -0.05 |
| 131 | -0.01 | 0     | -0.01 | 0.01  | -0.01 | 0     | -0.01 | 0     | -0.01 | 0     | -0.01 | 0.01  | -0.01 | 0.01  | -0.01 | 0.01  |
| 132 | -0.03 | 0.02  | -0.02 | 0.05  | -0.02 | 0.05  | -0.02 | 0.01  | -0.02 | 0.05  | -0.03 | 0     | -0.02 | 0.06  | -0.02 | 0.04  |
| 133 | -0.26 | -0.03 | -0.17 | 0.04  | -0.16 | 0.02  | -0.19 | 0.02  | -0.18 | 0.03  | -0.45 | 0.01  | -0.18 | 0.05  | -0.15 | 0.02  |
| 134 | -0.03 | 0.03  | -0.02 | 0.01  | -0.02 | 0.02  | -0.02 | 0     | -0.02 | 0.02  | -0.04 | 0     | -0.02 | 0.01  | -0.02 | 0.01  |
| 135 | -0.04 | -0.01 | -0.03 | -0.04 | -0.03 | -0.03 | -0.03 | -0.01 | -0.03 | -0.03 | -0.08 | -0.01 | -0.03 | -0.04 | -0.03 | -0.03 |
| 136 | -0.01 | 0.02  | -0.01 | 0     | -0.01 | 0     | -0.01 | 0     | -0.01 | 0     | -0.01 | -0.01 | -0.01 | 0     | -0.01 | 0     |
| 137 | -0.01 | -0.01 | 0     | 0.04  | 0     | 0.04  | 0     | 0     | 0     | 0.04  | -0.01 | -0.01 | -0.01 | 0.05  | 0     | 0.03  |
| 138 | -0.01 | 0.01  | -0.01 | -0.03 | -0.01 | -0.02 | -0.01 | 0     | -0.01 | -0.03 | -0.01 | 0     | -0.01 | -0.03 | -0.01 | -0.02 |
| 139 | 0     | -0.02 | 0     | 0.01  | 0     | 0     | 0     | 0     | 0     | 0     | 0     | 0.01  | 0     | 0.01  | 0     | 0     |
| 140 | -0.01 | 0.04  | -0.01 | 0.03  | -0.01 | 0.04  | -0.01 | 0     | -0.01 | 0.04  | -0.01 | -0.01 | -0.01 | 0.03  | -0.01 | 0.02  |
| 141 | -0.01 | 0.04  | -0.01 | 0.02  | 0     | 0.04  | -0.01 | 0     | -0.01 | 0.03  | -0.01 | -0.01 | -0.01 | 0.02  | -0.01 | 0.02  |
| 142 | -0.01 | 0.03  | 0     | 0.03  | 0     | 0.05  | -0.01 | 0     | -0.01 | 0.04  | -0.01 | 0     | -0.01 | 0.04  | -0.01 | 0.02  |
| 143 | 0     | 0.05  | 0     | 0.02  | 0     | 0.04  | 0     | 0     | 0     | 0.04  | 0     | -0.01 | 0     | 0.02  | 0     | 0.02  |
| 144 | 0     | 0.05  | 0     | 0.02  | 0     | 0.03  | 0     | 0     | 0     | 0.03  | 0     | -0.01 | 0     | 0.02  | 0     | 0.02  |
| 145 | 0     | 0.02  | 0     | 0.02  | 0     | 0.02  | 0     | 0     | 0     | 0.02  | 0     | 0     | 0     | 0.02  | 0     | 0.01  |
| 146 | 0     | 0.02  | 0     | 0.02  | 0     | 0.02  | 0     | 0     | 0     | 0.02  | 0     | -0.01 | 0     | 0.02  | 0     | 0.01  |
| 147 | 0     | 0     | 0     | 0.01  | 0     | 0.01  | 0     | 0     | 0     | 0.02  | 0     | 0     | 0     | 0.01  | 0     | 0.01  |
| 148 | 0     | 0     | 0     | 0.01  | 0     | 0.01  | 0     | 0     | 0     | 0     | 0     | 0     | 0     | 0.01  | 0     | 0     |
| 149 | 0     | 0     | 0     | 0.01  | 0     | 0.01  | 0     | 0     | 0     | 0.01  | 0     | 0     | 0     | 0.01  | 0     | 0     |
| 150 | 0     | 0     | 0     | 0     | 0     | 0.01  | 0     | 0     | 0     | 0.01  | 0     | 0     | 0     | 0     | 0     | 0     |
| 151 | 0     | 0     | 0     | 0     | 0     | 0     | 0     | 0     | 0     | 0     | 0     | 0     | 0     | 0     | 0     | 0     |
| 152 | 0     | 0.01  | 0     | 0.01  | 0     | 0.01  | 0     | 0     | 0     | 0.01  | 0     | 0     | 0     | 0.01  | 0     | 0.01  |
| 153 | 0     | 0     | 0     | -0.01 | 0     | -0.01 | 0     | 0     | 0     | -0.01 | 0     | 0     | 0     | -0.01 | 0     | 0     |
| 154 | 0     | -0.01 | 0     | -0.01 | 0     | -0.01 | 0     | 0     | 0     | -0.01 | 0     | 0     | 0     | -0.01 | 0     | -0.01 |
| 155 | 0     | 0     | 0     | 0.01  | 0     | 0.01  | 0     | 0     | 0     | 0.01  | 0     | 0.01  | 0     | 0.02  | 0     | 0.01  |
| 156 | -0.01 | 0.02  | -0.01 | -0.01 | -0.01 | 0     | -0.01 | 0     | -0.01 | -0.01 | -0.01 | -0.01 | -0.01 | 0     | -0.01 | 0     |
| 157 | 0     | 0     | 0     | 0.02  | 0     | 0.02  | 0     | 0     | 0     | 0.01  | 0     | 0.01  | 0     | 0.02  | 0     | 0.01  |
| 158 | -0.03 | 0.02  | -0.02 | -0.01 | -0.02 | 0     | -0.03 | 0     | -0.03 | -0.01 | -0.02 | -0.01 | -0.03 | 0     | -0.03 | 0     |
| 159 | -0.01 | -0.03 | -0.01 | -0.01 | -0.01 | -0.02 | -0.01 | 0     | -0.01 | 0     | -0.01 | 0     | -0.01 | -0.02 | -0.01 | -0.01 |
| 160 | -0.03 | 0.04  | -0.02 | 0     | -0.02 | 0.02  | -0.03 | 0     | -0.02 | -0.01 | -0.02 | -0.01 | -0.03 | 0.02  | -0.03 | 0.01  |
| 161 | -0.01 | -0.02 | -0.01 | 0     | -0.01 | -0.01 | -0.01 | 0.01  | -0.01 | 0.01  | 0     | 0.01  | -0.01 | -0.02 | -0.01 | -0.01 |
| 162 | -0.03 | 0.07  | -0.04 | 0.02  | -0.03 | 0.08  | -0.03 | 0     | -0.02 | 0.07  | -0.03 | 0     | -0.03 | 0.03  | -0.03 | -0.02 |



|     |       |       |       |        |       |        |       |       |       |        |       |       |       |       |       |       |
|-----|-------|-------|-------|--------|-------|--------|-------|-------|-------|--------|-------|-------|-------|-------|-------|-------|
| 208 | 0     | 0     | 0     | 0      | 0     | 0      | 0     | 0     | 0     | 0      | 0     | 0     | 0     | 0     | 0     | 0     |
| 209 | 0     | 0     | 0     | 0      | 0     | 0      | 0     | 0     | 0     | 0      | 0     | 0     | 0     | 0     | 0     | 0     |
| 210 | 0     | -0.01 | 0     | -0.01  | 0     | -0.01  | 0     | 0     | 0     | 0      | 0     | 0     | 0     | -0.01 | 0     | 0     |
| 211 | 0     | -0.01 | 0     | 0      | 0     | 0      | 0     | 0     | 0     | 0      | 0     | 0     | 0     | 0     | 0     | 0     |
| 212 | 0     | -0.04 | 0     | -0.01  | 0     | -0.02  | 0     | -0.01 | 0     | -0.01  | 0     | 0.01  | 0     | -0.02 | 0     | -0.02 |
| 213 | 0     | -0.05 | 0     | -0.02  | 0     | -0.03  | 0     | -0.01 | 0     | -0.02  | 0     | 0.01  | 0     | -0.03 | 0     | -0.02 |
| 214 | 0     | -0.02 | 0     | -0.01  | 0     | -0.01  | 0     | 0     | 0     | -0.01  | 0     | 0     | 0     | -0.01 | 0     | -0.01 |
| 215 | 0     | -0.01 | 0     | -0.01  | 0     | -0.01  | 0     | 0     | 0     | 0      | 0     | 0     | 0     | -0.01 | 0     | -0.01 |
| 216 | 0     | 0.01  | 0     | 0.02   | 0     | 0.01   | 0     | 0     | 0     | 0.01   | 0     | 0     | 0     | 0.02  | 0     | 0.01  |
| 217 | -0.01 | -0.04 | -0.01 | -0.02  | 0     | -0.02  | -0.01 | 0     | -0.01 | -0.01  | -0.01 | 0.01  | -0.01 | -0.02 | -0.01 | -0.02 |
| 218 | -0.04 | 0.05  | -0.02 | 0.05   | -0.01 | 0.05   | -0.02 | 0.03  | -0.02 | 0.04   | -0.02 | 0.01  | -0.02 | 0.06  | -0.02 | 0.03  |
| 219 | -0.04 | -0.03 | -0.03 | 0.01   | -0.02 | 0.01   | -0.03 | 0.01  | -0.02 | 0.01   | -0.03 | 0.05  | -0.03 | 0.02  | -0.03 | -0.02 |
| 220 | -1.15 | 0.07  | -0.8  | 0.09   | -0.66 | 0.09   | -0.88 | 0.06  | -0.78 | 0.11   | -1.02 | 0.09  | -0.78 | 0.12  | -0.62 | 0.05  |
| 221 | -0.11 | -0.04 | -0.09 | -0.06  | -0.08 | -0.03  | -0.09 | -0.01 | -0.09 | -0.07  | -0.12 | -0.02 | -0.09 | -0.07 | -0.08 | -0.04 |
| 222 | -1.33 | 12.12 | -1.61 | -11.75 | -1.55 | -11.95 | 0.22  | -9.65 | -0.55 | -12.07 | -0.33 | -11.9 | -1.68 | 11.61 | -2.28 | -5.99 |
| 223 | -0.36 | -0.05 | -0.33 | -0.01  | -0.3  | -0.11  | -0.37 | -0.05 | -0.36 | -0.07  | -0.44 | -0.05 | -0.38 | -0.06 | -0.28 | -0.01 |
| 224 | -2.13 | 0.4   | -2.32 | 1.12   | -2.15 | 0.77   | -3.05 | 0.98  | -2.95 | 1.05   | -2.62 | -0.26 | -2.4  | 0.91  | -1.94 | 1.25  |
| 225 | -6.31 | -1.86 | -4.85 | -2.26  | -2.53 | 1.66   | -6.83 | -1.48 | -3.4  | 1.12   | -7.15 | -0.55 | -4.68 | -3.45 | -5.49 | -4.51 |
| 226 | -0.76 | -2.52 | -1.86 | -2.48  | -2.06 | -0.74  | -0.57 | -3.37 | -1.77 | 0.17   | -1.75 | -1.74 | -1.19 | -3.67 | -1.92 | -2.39 |
| 227 | -1.16 | -0.08 | -1.86 | -0.29  | -0.91 | -0.34  | -0.77 | -0.16 | -0.64 | -0.17  | -2.64 | -0.82 | -0.74 | -0.26 | -0.8  | -0.07 |
| 228 | -0.18 | 0     | -0.19 | 0.08   | -0.14 | 0.14   | -0.13 | 0.06  | -0.14 | 0.07   | -0.24 | 0.09  | -0.12 | 0.05  | -0.16 | 0.02  |
| 229 | -1.55 | -0.29 | -0.86 | -0.07  | -0.68 | -0.07  | -1.58 | -0.08 | -0.87 | -0.03  | -2.54 | -0.14 | -0.78 | -0.12 | -1.39 | -0.06 |
| 230 | -0.08 | 0.16  | -0.06 | 0.04   | -0.04 | 0.06   | -0.07 | 0.06  | -0.05 | 0.03   | -0.1  | 0.01  | -0.06 | 0.05  | -0.07 | 0.04  |
| 231 | -0.04 | -0.03 | -0.04 | -0.03  | -0.03 | 0      | -0.04 | 0     | -0.03 | 0      | -0.05 | 0.02  | -0.04 | -0.02 | -0.05 | -0.03 |
| 232 | -0.04 | -0.03 | -0.05 | -0.03  | -0.04 | -0.01  | -0.04 | 0     | -0.03 | -0.01  | -0.04 | 0.02  | -0.04 | -0.02 | -0.05 | -0.02 |
| 233 | -0.01 | -0.05 | -0.01 | -0.01  | -0.01 | -0.02  | -0.01 | -0.01 | -0.01 | -0.01  | -0.01 | 0.01  | -0.01 | -0.02 | -0.01 | -0.02 |
| 234 | -0.01 | -0.07 | -0.01 | -0.03  | -0.01 | -0.02  | -0.01 | -0.01 | -0.01 | -0.01  | -0.01 | 0.02  | -0.01 | -0.03 | -0.01 | -0.04 |
| 235 | -0.03 | -0.08 | -0.03 | -0.02  | -0.02 | -0.04  | -0.02 | -0.02 | -0.02 | -0.02  | -0.03 | 0.01  | -0.02 | -0.03 | -0.02 | -0.03 |
| 236 | -0.01 | 0.01  | -0.01 | 0      | -0.01 | -0.01  | -0.01 | 0     | -0.01 | 0      | -0.01 | 0.01  | -0.01 | -0.01 | -0.01 | 0.01  |
| 237 | 0     | -0.05 | 0     | -0.01  | 0     | -0.02  | 0     | -0.01 | 0     | -0.01  | 0     | 0.01  | 0     | -0.01 | 0     | -0.02 |
| 238 | -0.01 | -0.05 | -0.01 | -0.01  | -0.01 | -0.02  | -0.01 | -0.02 | -0.01 | -0.01  | -0.01 | 0     | -0.01 | -0.02 | -0.01 | -0.02 |
| 239 | -0.01 | -0.14 | -0.02 | -0.03  | -0.01 | -0.09  | -0.01 | -0.06 | -0.01 | -0.04  | -0.01 | 0.01  | -0.01 | -0.07 | -0.01 | -0.05 |
| 240 | 0     | -0.03 | 0     | -0.01  | 0     | -0.01  | 0     | -0.01 | 0     | 0      | 0     | 0     | 0     | -0.01 | 0     | -0.01 |
| 241 | 0     | -0.02 | 0     | 0      | 0     | -0.01  | 0     | -0.01 | 0     | -0.01  | 0     | 0     | 0     | -0.01 | 0     | -0.01 |
| 242 | 0     | -0.02 | 0     | 0      | 0     | -0.01  | 0     | -0.01 | 0     | 0      | 0     | 0     | 0     | -0.01 | 0     | -0.01 |
| 243 | 0     | -0.01 | 0     | -0.01  | 0     | -0.01  | 0     | 0     | 0     | 0      | 0     | 0     | 0     | -0.01 | 0     | -0.01 |
| 244 | 0     | -0.02 | 0     | 0      | 0     | -0.02  | 0     | -0.01 | 0     | -0.01  | 0     | 0     | 0     | 0     | 0     | 0.01  |
| 245 | 0     | 0.03  | -0.01 | 0      | 0     | 0.03   | 0     | 0.01  | 0     | 0.01   | 0     | 0     | 0     | 0     | 0     | -0.01 |
| 246 | -0.01 | -0.04 | -0.01 | -0.01  | -0.01 | -0.04  | -0.01 | -0.02 | -0.01 | -0.01  | -0.01 | 0.02  | -0.01 | -0.02 | -0.01 | -0.01 |
| 247 | -0.04 | -0.06 | -0.06 | 0.02   | -0.05 | -0.07  | -0.03 | -0.03 | -0.03 | -0.02  | -0.03 | 0.04  | -0.03 | -0.02 | -0.04 | 0.03  |
| 248 | -0.16 | 0.08  | -0.2  | -0.03  | -0.16 | 0.1    | -0.1  | 0.05  | -0.13 | 0.02   | -0.06 | -0.04 | -0.14 | 0.01  | -0.14 | -0.02 |
| 249 | -2.32 | 0.26  | -1.79 | -0.05  | -2.11 | 0.28   | -1.43 | -0.06 | -0.2  | 0.03   | -0.25 | -0.18 | -0.72 | 0.05  | -1.5  | -0.08 |
| 250 | -0.16 | 0.08  | -0.3  | 0.05   | -0.17 | 0.03   | -0.15 | 0.02  | -0.08 | 0.01   | -0.09 | 0.01  | -0.13 | -0.02 | -0.14 | 0.05  |
| 251 | -1.02 | -0.16 | -1.76 | 0.06   | -0.85 | -0.46  | -0.83 | 0.13  | -0.91 | -0.03  | -0.99 | 0.06  | -0.91 | 0.07  | -1.11 | 0.07  |

|     |       |       |       |       |       |       |       |       |       |       |       |       |       |       |       |       |
|-----|-------|-------|-------|-------|-------|-------|-------|-------|-------|-------|-------|-------|-------|-------|-------|-------|
| 252 | -0.04 | -0.01 | -0.06 | -0.01 | -0.04 | 0.03  | -0.03 | 0     | -0.03 | 0.01  | -0.04 | -0.01 | -0.03 | 0     | -0.04 | -0.02 |
| 253 | -0.01 | 0.04  | -0.02 | 0.01  | -0.02 | 0.02  | -0.01 | 0.03  | -0.01 | 0.01  | -0.01 | 0.01  | -0.01 | 0.01  | -0.01 | 0.03  |
| 254 | 0     | 0.01  | -0.01 | 0     | 0     | 0.01  | 0     | 0     | 0     | 0.01  | 0     | 0     | 0     | 0     | 0     | -0.01 |
| 255 | 0     | 0.01  | 0     | 0     | 0     | 0     | 0     | 0.01  | 0     | 0     | 0     | 0     | 0     | 0     | 0     | 0     |
| 256 | 0     | 0.01  | 0     | 0     | 0     | 0.01  | 0     | 0.01  | 0     | 0.01  | 0     | 0     | 0     | 0     | 0     | 0     |
| 257 | 0     | 0.01  | 0     | 0     | 0     | 0.01  | 0     | 0     | 0     | 0     | 0     | 0     | 0     | 0     | 0     | 0     |
| 258 | 0     | -0.01 | 0     | 0     | 0     | -0.01 | 0     | -0.01 | 0     | -0.01 | 0     | 0     | 0     | 0     | 0     | 0     |
| 259 | 0     | 0.01  | 0     | 0     | 0     | 0     | 0     | 0     | 0     | 0     | 0     | 0     | 0     | 0     | 0     | 0.01  |
| 260 | 0     | 0.01  | 0     | 0     | 0     | 0     | 0     | 0     | 0     | 0     | 0     | 0     | 0     | 0     | 0     | 0.01  |
| 261 | 0     | 0     | 0     | 0     | 0     | 0     | 0     | 0     | 0     | 0     | 0     | 0     | 0     | 0     | 0     | 0     |
| 262 | 0     | -0.02 | 0     | 0     | 0     | -0.01 | 0     | -0.01 | 0     | -0.01 | 0     | 0     | 0     | -0.01 | 0     | 0     |
| 263 | 0     | 0.02  | 0     | 0     | 0     | 0.01  | 0     | 0.01  | 0     | 0.01  | 0     | 0     | 0     | 0     | 0     | 0     |
| 264 | 0     | 0.01  | 0     | 0.01  | 0     | 0.01  | 0     | 0     | 0     | 0     | 0     | -0.01 | 0     | 0.01  | 0     | 0.01  |
| 265 | 0     | -0.02 | 0     | -0.01 | 0     | -0.01 | 0     | 0     | 0     | 0     | 0     | 0     | 0     | -0.01 | 0     | -0.01 |
| 266 | 0     | 0.01  | 0     | 0.01  | 0     | 0.02  | 0     | 0     | 0     | 0.01  | 0     | 0     | 0     | 0.02  | 0     | 0.01  |
| 267 | -0.01 | -0.03 | -0.01 | 0     | -0.01 | -0.01 | -0.01 | 0     | -0.01 | 0     | -0.01 | 0.01  | -0.01 | 0     | -0.01 | -0.01 |
| 268 | 0     | 0.01  | 0     | 0     | 0     | 0     | 0     | 0     | 0     | 0     | 0     | -0.01 | 0     | 0     | 0     | 0     |
| 269 | 0     | -0.01 | 0     | 0.01  | 0     | 0.01  | 0     | 0     | 0     | 0.01  | 0     | 0.01  | 0     | 0.01  | 0     | 0     |
| 270 | 0     | -0.01 | 0     | 0     | 0     | 0     | 0     | 0     | 0     | 0     | 0     | 0     | 0     | 0     | 0     | -0.01 |
| 271 | 0     | -0.01 | 0     | 0     | 0     | 0     | 0     | 0     | 0     | 0     | 0     | 0     | 0     | 0     | 0     | 0     |
| 272 | 0     | 0.01  | 0     | 0     | 0     | 0     | 0     | 0     | 0     | 0     | 0     | 0     | 0     | 0     | 0     | 0     |
| 273 | 0     | -0.02 | 0     | 0     | 0     | -0.01 | 0     | 0     | 0     | 0     | 0     | 0     | 0     | 0     | 0     | -0.01 |
| 274 | 0     | 0.01  | 0     | -0.01 | 0     | 0     | 0     | 0     | 0     | -0.01 | 0     | -0.01 | 0     | -0.01 | 0     | 0     |
| 275 | 0     | -0.01 | 0     | -0.01 | 0     | -0.01 | 0     | 0     | 0     | -0.01 | 0     | 0     | 0     | -0.01 | 0     | 0     |
| 276 | -0.01 | 0     | -0.01 | 0     | 0     | 0     | -0.01 | -0.01 | 0     | 0     | -0.01 | -0.01 | -0.01 | 0.01  | -0.01 | 0     |
| 277 | 0     | 0.04  | 0     | 0     | 0     | 0.02  | 0     | 0.03  | 0     | 0.02  | 0     | 0.01  | 0     | 0     | 0     | 0     |
| 278 | 0     | 0.02  | 0     | 0     | 0     | 0.02  | 0     | 0.01  | 0     | 0.02  | 0     | 0.01  | 0     | 0     | 0     | 0     |
| 279 | 0     | 0     | 0     | 0     | 0     | 0.01  | 0     | 0.01  | 0     | 0.02  | 0     | 0.01  | 0     | 0     | 0     | -0.01 |
| 280 | -0.01 | 0.01  | -0.01 | 0     | 0     | 0     | 0     | 0.02  | 0     | 0.01  | 0     | 0.02  | 0     | -0.01 | 0     | 0     |
| 281 | -0.01 | 0.05  | -0.01 | 0.01  | -0.01 | 0.04  | -0.01 | 0.02  | -0.01 | 0.02  | -0.01 | 0     | -0.01 | 0.02  | -0.01 | 0.01  |
| 282 | -0.01 | -0.05 | -0.01 | -0.01 | -0.01 | -0.06 | -0.01 | -0.01 | -0.01 | -0.03 | -0.01 | 0.02  | -0.01 | -0.02 | -0.01 | 0.01  |
| 283 | -0.05 | 0.02  | -0.1  | 0     | -0.06 | 0.01  | -0.03 | -0.01 | -0.03 | -0.02 | -0.05 | -0.01 | -0.05 | 0.02  | -0.04 | 0.01  |
| 284 | -0.01 | -0.01 | -0.01 | -0.01 | -0.01 | 0     | -0.01 | 0     | -0.01 | 0.02  | -0.01 | 0.01  | -0.01 | -0.01 | -0.01 | -0.02 |
| 285 | -0.02 | 0     | -0.04 | 0.02  | -0.03 | 0     | -0.01 | 0.01  | -0.02 | -0.02 | -0.01 | 0.01  | -0.02 | 0.02  | -0.02 | 0.04  |
| 286 | 0     | 0.01  | -0.01 | -0.01 | -0.01 | 0.01  | 0     | 0     | 0     | 0.01  | 0     | 0     | 0     | 0     | -0.01 | -0.01 |
| 287 | -0.01 | 0.04  | -0.01 | 0.02  | -0.01 | 0.04  | -0.01 | 0.04  | -0.01 | 0.01  | 0     | 0.01  | -0.01 | 0.02  | -0.01 | 0.06  |
| 288 | 0     | 0.02  | 0     | 0     | 0     | 0.01  | 0     | 0.01  | 0     | 0     | 0     | 0     | 0     | 0.01  | 0     | 0.01  |
| 289 | 0     | 0.01  | 0     | 0     | 0     | 0.01  | 0     | 0     | 0     | 0     | 0     | 0     | 0     | 0.01  | 0     | 0.01  |
| 290 | 0     | -0.01 | 0     | -0.01 | 0     | -0.01 | 0     | -0.01 | 0     | 0     | 0     | 0     | 0     | -0.01 | 0     | -0.02 |
| 291 | 0     | -0.01 | 0     | 0     | 0     | -0.01 | 0     | 0     | 0     | -0.01 | 0     | 0     | 0     | 0     | 0     | 0.01  |
| 292 | -0.01 | -0.02 | -0.01 | -0.01 | -0.01 | -0.01 | 0     | 0     | -0.01 | 0     | 0     | 0.01  | 0     | -0.01 | -0.01 | -0.01 |
| 293 | -0.01 | -0.01 | -0.01 | 0     | -0.01 | -0.01 | 0     | -0.01 | 0     | -0.01 | 0     | -0.01 | 0     | 0.01  | -0.01 | 0.01  |
| 294 | -0.07 | -0.05 | -0.22 | 0.01  | -0.09 | -0.07 | -0.04 | -0.01 | -0.05 | -0.03 | -0.09 | 0.03  | -0.06 | -0.02 | -0.06 | 0.02  |
| 295 | -0.02 | 0.14  | -0.04 | 0.02  | -0.02 | 0.13  | -0.02 | 0.08  | -0.02 | 0.07  | -0.03 | 0.02  | -0.02 | 0.04  | -0.02 | 0     |
| 296 | -0.04 | 0.12  | -0.05 | 0.02  | -0.03 | -0.04 | -0.03 | 0.07  | -0.03 | 0.01  | -0.05 | 0.09  | -0.03 | 0.02  | -0.03 | 0.04  |



|     |       |       |       |       |       |       |       |       |       |       |       |       |       |       |       |       |
|-----|-------|-------|-------|-------|-------|-------|-------|-------|-------|-------|-------|-------|-------|-------|-------|-------|
| 297 | -0.06 | -0.11 | -0.08 | -0.04 | -0.05 | -0.04 | -0.05 | -0.01 | -0.05 | -0.01 | -0.08 | -0.02 | -0.05 | -0.03 | -0.06 | -0.06 |
| 298 | -2.32 | 0.56  | -2.9  | -0.44 | -2.56 | 0.19  | -1.43 | 0.03  | -1.5  | 0.21  | -2.91 | -0.11 | -1.74 | 0.2   | -1.84 | 0.22  |
| 299 | -0.25 | 0.05  | -0.18 | -0.02 | -0.13 | 0.05  | -0.16 | 0.02  | -0.07 | 0.02  | -0.14 | -0.02 | -0.09 | 0.02  | -0.13 | -0.01 |
| 300 | -1.89 | 0.4   | -3.4  | -0.12 | -2.5  | -0.25 | -3.01 | -0.25 | -2.46 | -0.19 | -2.09 | -0.05 | -2.69 | -0.07 | -2.93 | -0.06 |
| 301 | -0.17 | 0.02  | -0.61 | 0.08  | -0.24 | 0.01  | -0.45 | -0.04 | -0.39 | -0.03 | -0.43 | 0.01  | -0.78 | 0.04  | -0.77 | -0.14 |
| 302 | -2.44 | -0.29 | -3.29 | -0.3  | -1.77 | -0.11 | -2.62 | 0.02  | -2.14 | -0.08 | -2.46 | 0.07  | -3.53 | -0.39 | -3.75 | -0.37 |
| 303 | -1.59 | 0.65  | -1.18 | -0.07 | -0.38 | 0.03  | -0.5  | 0     | -0.55 | 0.05  | -0.35 | 0     | -1.35 | -0.04 | -1.06 | 0.04  |
| 304 | -0.32 | -0.1  | -0.08 | 0.06  | -0.03 | 0.05  | -0.03 | -0.01 | -0.03 | 0.03  | -0.04 | 0     | -0.09 | 0.08  | -0.05 | 0.06  |
| 305 | -0.25 | -0.05 | -0.06 | -0.01 | -0.02 | -0.02 | -0.03 | 0.01  | -0.03 | -0.02 | -0.04 | -0.02 | -0.06 | -0.02 | -0.03 | -0.02 |
| 306 | -1.37 | -0.42 | -0.3  | -0.11 | -0.11 | -0.14 | -0.12 | 0     | -0.11 | -0.11 | -0.2  | -0.09 | -0.3  | -0.18 | -0.16 | -0.15 |
| 307 | -0.68 | -0.26 | -0.09 | -0.1  | -0.04 | -0.06 | -0.05 | -0.03 | -0.04 | -0.05 | -0.05 | 0.05  | -0.09 | -0.11 | -0.06 | -0.11 |
| 308 | -0.15 | -0.11 | -0.05 | -0.08 | -0.03 | -0.05 | -0.04 | -0.04 | -0.03 | -0.04 | -0.04 | 0.02  | -0.05 | -0.08 | -0.05 | -0.07 |
| 309 | -0.9  | 0.11  | -0.29 | 0.1   | -0.17 | 0.08  | -0.26 | 0.07  | -0.19 | 0.06  | -0.29 | 0.02  | -0.35 | 0.11  | -0.27 | 0.08  |
| 310 | -0.14 | -0.07 | -0.11 | -0.04 | -0.08 | -0.04 | -0.11 | -0.06 | -0.09 | -0.05 | -0.13 | -0.1  | -0.1  | -0.05 | -0.1  | 0     |
| 311 | -2.47 | 0.1   | -1.95 | 0.14  | -1.72 | 0.16  | -2.15 | 0.15  | -1.91 | 0.14  | -1.89 | 0.18  | -1.8  | 0.17  | -2.03 | 0.03  |
| 312 | -0.11 | -0.13 | -0.09 | -0.12 | -0.07 | -0.13 | -0.09 | -0.07 | -0.07 | -0.12 | -0.1  | -0.1  | -0.08 | -0.13 | -0.08 | -0.06 |
| 313 | -0.12 | -0.08 | -0.11 | -0.01 | -0.08 | 0.04  | -0.1  | -0.14 | -0.08 | -0.03 | -0.12 | -0.2  | -0.1  | 0.01  | -0.1  | 0     |
| 314 | -0.25 | 0.09  | -0.24 | -0.31 | -0.19 | 0.05  | -0.25 | -0.29 | -0.19 | -0.23 | -0.21 | -0.05 | -0.33 | 0.06  | -0.26 | -0.22 |
| 315 | -0.05 | -0.14 | -0.06 | -0.04 | -0.04 | -0.06 | -0.04 | -0.07 | -0.04 | -0.04 | -0.06 | -0.07 | -0.05 | -0.04 | -0.04 | -0.04 |
| 316 | -0.02 | -0.02 | -0.02 | 0.03  | -0.02 | 0.04  | -0.02 | -0.02 | -0.02 | 0.03  | -0.02 | -0.01 | -0.02 | 0.04  | -0.02 | 0     |
| 317 | -0.03 | 0.03  | -0.04 | 0.04  | -0.03 | 0.06  | -0.04 | -0.01 | -0.03 | 0.03  | -0.03 | -0.01 | -0.04 | 0.06  | -0.03 | 0.02  |
| 318 | -0.01 | -0.02 | -0.01 | -0.01 | -0.01 | -0.01 | -0.01 | -0.03 | 0     | -0.02 | -0.01 | -0.02 | -0.01 | 0     | -0.01 | 0     |
| 319 | 0     | -0.02 | 0     | 0     | 0     | 0     | 0     | -0.02 | 0     | -0.01 | 0     | -0.01 | 0     | 0     | 0     | 0     |
| 320 | -0.01 | -0.01 | -0.01 | -0.01 | 0     | -0.01 | -0.01 | 0     | 0     | -0.01 | -0.01 | 0     | -0.01 | -0.01 | -0.01 | -0.01 |
| 321 | 0     | 0.03  | 0     | 0     | 0     | 0.01  | 0     | 0     | 0     | 0     | 0     | -0.01 | 0     | 0.01  | 0     | 0.01  |
| 322 | -0.01 | -0.01 | -0.01 | 0.03  | -0.01 | 0.02  | -0.01 | 0.01  | -0.01 | 0.03  | -0.01 | 0.02  | -0.01 | 0.03  | -0.01 | 0     |
| 323 | 0     | 0.01  | 0     | -0.01 | 0     | 0     | 0     | 0     | 0     | 0     | 0     | -0.01 | 0     | -0.01 | 0     | 0     |
| 324 | -0.02 | -0.02 | -0.02 | 0.01  | -0.02 | 0     | -0.02 | 0.01  | -0.02 | 0     | -0.02 | 0.01  | -0.02 | 0.01  | -0.02 | 0     |
| 325 | 0     | 0     | 0     | 0     | 0     | 0     | 0     | 0     | 0     | 0     | 0     | 0     | 0     | 0     | 0     | 0     |
| 326 | -0.01 | -0.01 | 0     | -0.04 | 0     | -0.04 | -0.01 | 0     | 0     | -0.05 | -0.01 | 0     | -0.01 | -0.05 | 0     | -0.03 |
| 327 | 0     | 0     | 0     | 0.01  | 0     | 0.01  | 0     | 0     | 0     | 0.01  | 0     | 0     | 0     | 0.01  | 0     | 0     |
| 328 | 0     | 0.02  | 0     | 0.02  | 0     | 0.02  | 0     | 0     | 0     | 0.01  | 0     | 0     | 0     | 0.02  | 0     | 0.01  |
| 329 | 0     | 0.03  | 0     | 0.05  | 0     | 0.05  | 0     | 0.01  | 0     | 0.05  | 0     | 0.01  | 0     | 0.06  | 0     | 0.03  |
| 330 | 0     | -0.01 | 0     | 0     | 0     | -0.01 | 0     | 0     | 0     | 0     | 0     | 0     | 0     | 0     | 0     | -0.01 |
| 331 | -0.01 | 0.02  | -0.01 | 0.02  | 0     | 0.03  | -0.01 | 0     | -0.01 | 0.02  | -0.01 | 0     | -0.01 | 0.03  | -0.01 | 0.01  |
| 332 | 0     | -0.01 | 0     | -0.02 | 0     | -0.03 | 0     | 0     | 0     | -0.02 | 0     | -0.01 | 0     | -0.03 | 0     | -0.01 |
| 333 | -0.01 | 0.01  | -0.01 | 0.01  | -0.01 | 0.01  | -0.01 | 0     | -0.01 | 0     | -0.01 | 0     | -0.01 | 0.01  | -0.01 | 0     |
| 334 | 0     | -0.01 | 0     | -0.01 | 0     | -0.02 | 0     | 0     | 0     | -0.01 | 0     | 0     | 0     | -0.02 | 0     | -0.01 |
| 335 | 0     | -0.01 | 0     | 0     | 0     | 0     | 0     | 0     | 0     | 0     | 0     | 0     | 0     | 0.01  | 0     | 0     |
| 336 | 0     | 0.02  | 0     | 0.01  | 0     | 0.02  | 0     | 0     | 0     | 0.01  | 0     | 0     | 0     | 0.02  | 0     | 0.01  |
| 337 | 0     | -0.01 | 0     | -0.01 | 0     | -0.01 | 0     | 0.01  | 0     | 0     | 0     | 0     | 0     | -0.01 | 0     | -0.01 |

**Table S6.** Per-residue decomposition values (kcal/mol) for simulated inhibitor in CatD (Part 2).

| Residue | 2e | 3a | 4a | 5a | 5b |
|---------|----|----|----|----|----|
|---------|----|----|----|----|----|

|    | Vvdw  | Vele  |
|----|-------|-------|-------|-------|-------|-------|-------|-------|-------|-------|
| 1  | 0     | 0.01  | 0     | 0.01  | 0     | 0     | 0     | 0     | 0     | 0.01  |
| 2  | 0     | -0.02 | 0     | -0.01 | 0     | 0     | 0     | 0     | 0     | -0.01 |
| 3  | 0     | 0.01  | 0     | 0     | 0     | 0     | 0     | 0     | 0     | 0.01  |
| 4  | -0.01 | -0.01 | 0     | 0     | 0     | 0.01  | 0     | 0.01  | 0     | 0.01  |
| 5  | 0     | -0.02 | 0     | -0.02 | 0     | 0.01  | 0     | 0.01  | 0     | -0.01 |
| 6  | -0.02 | 0.04  | -0.01 | 0.01  | -0.01 | -0.02 | -0.01 | -0.02 | -0.01 | 0     |
| 7  | -0.02 | -0.06 | -0.01 | -0.01 | -0.01 | 0.02  | -0.01 | 0.02  | -0.01 | -0.02 |
| 8  | -0.04 | 0     | -0.02 | 0.02  | -0.02 | 0.01  | -0.01 | 0.01  | -0.02 | 0.03  |
| 9  | -0.21 | -0.02 | -0.12 | 0.09  | -0.08 | 0.02  | -0.06 | 0.02  | -0.07 | 0.04  |
| 10 | -0.25 | 0.19  | -0.05 | 0.1   | -0.05 | 0.01  | -0.03 | 0.01  | -0.05 | 0.07  |
| 11 | -0.43 | 0.29  | -0.07 | 0.12  | -0.06 | -0.01 | -0.05 | -0.02 | -0.07 | 0.08  |
| 12 | -2.41 | -0.09 | -0.56 | 0.22  | -0.47 | 0.14  | -0.38 | 0.13  | -0.42 | 0.06  |
| 13 | -2.26 | 0.56  | -1.6  | 0     | -0.79 | 0.06  | -0.51 | -0.01 | -2.76 | -1.07 |
| 14 | -0.26 | -0.07 | -0.15 | 0.01  | -0.09 | 0.02  | -0.09 | 0.04  | -0.1  | -0.03 |
| 15 | -0.1  | 0.02  | -0.08 | 0.05  | -0.04 | -0.04 | -0.04 | -0.02 | -0.04 | 0.03  |
| 16 | -0.01 | -0.01 | -0.01 | -0.01 | -0.01 | 0.02  | -0.01 | 0.02  | -0.01 | 0.01  |
| 17 | -0.01 | -0.01 | 0     | 0     | 0     | 0     | 0     | 0     | 0     | -0.01 |
| 18 | -0.01 | 0.01  | -0.01 | 0.01  | -0.01 | 0     | -0.01 | 0     | -0.01 | 0.01  |
| 19 | 0     | -0.02 | 0     | -0.01 | 0     | 0.01  | 0     | 0     | 0     | -0.01 |
| 20 | 0     | 0.01  | 0     | 0     | 0     | 0     | 0     | 0     | 0     | 0     |
| 21 | 0     | -0.01 | 0     | 0     | 0     | 0     | 0     | 0     | 0     | 0     |
| 22 | 0     | 0     | 0     | 0     | 0     | 0     | 0     | 0     | 0     | 0     |
| 23 | 0     | 0     | 0     | 0     | 0     | 0     | 0     | 0     | 0     | 0     |
| 24 | 0     | 0.01  | 0     | 0.01  | 0     | -0.01 | 0     | 0     | 0     | 0.01  |
| 25 | 0     | 0     | 0     | -0.01 | 0     | 0.01  | 0     | 0.01  | 0     | 0     |
| 26 | 0     | 0.02  | 0     | 0     | 0     | -0.01 | 0     | -0.01 | 0     | 0.01  |
| 27 | -0.01 | -0.01 | -0.01 | 0.01  | -0.01 | -0.01 | -0.01 | -0.01 | -0.01 | -0.01 |
| 28 | -0.02 | 0.07  | -0.02 | 0     | -0.01 | -0.01 | -0.01 | -0.01 | -0.01 | 0.03  |
| 29 | -0.07 | 0.01  | -0.06 | 0.02  | -0.04 | -0.05 | -0.04 | -0.04 | -0.04 | 0.01  |
| 30 | -1.36 | 0.01  | -0.99 | -0.02 | -0.41 | 0.01  | -0.43 | -0.03 | -0.47 | -0.03 |
| 31 | -0.12 | -0.04 | -0.11 | 0.03  | -0.08 | -0.02 | -0.08 | 0.01  | -0.08 | 0.03  |
| 32 | -2.43 | -1.66 | -1.92 | -0.19 | 0.43  | -4.29 | -0.2  | -3.35 | -1.87 | 0.77  |
| 33 | -0.27 | 0.16  | -0.31 | 0.01  | -0.28 | 0     | -0.29 | -0.05 | -0.28 | 0.05  |
| 34 | -1.89 | 0.75  | -2.13 | -0.87 | -2.53 | 0.15  | -1.82 | -0.37 | -1.98 | 0.55  |
| 35 | -1.19 | -0.58 | -2.04 | -0.09 | -1.12 | -0.12 | -2.14 | -0.29 | -0.71 | 0.01  |
| 36 | -0.08 | 0.03  | -0.12 | 0.05  | -0.07 | -0.07 | -0.13 | -0.01 | -0.05 | 0     |
| 37 | -0.07 | -0.2  | -0.1  | -0.12 | -0.06 | 0.1   | -0.09 | 0.03  | -0.05 | -0.02 |
| 38 | -0.03 | 0     | -0.03 | -0.01 | -0.02 | 0     | -0.03 | -0.01 | -0.02 | 0     |
| 39 | -0.19 | -0.05 | -0.29 | -0.01 | -0.2  | 0.03  | -0.22 | 0.02  | -0.25 | -0.03 |
| 40 | -0.01 | -0.02 | -0.02 | 0     | -0.01 | 0.01  | -0.01 | 0     | -0.01 | -0.01 |
| 41 | -0.01 | -0.03 | -0.01 | 0.01  | -0.01 | 0     | -0.01 | 0     | -0.01 | -0.02 |
| 42 | 0     | 0.01  | 0     | 0     | 0     | 0     | 0     | 0     | 0     | 0     |
| 43 | 0     | 0.01  | 0     | 0     | 0     | 0     | 0     | 0     | 0     | 0     |
| 44 | 0     | 0.01  | 0     | 0.01  | 0     | -0.01 | 0     | -0.01 | 0     | 0     |

|    |       |       |       |       |       |       |       |       |       |       |
|----|-------|-------|-------|-------|-------|-------|-------|-------|-------|-------|
| 45 | 0     | -0.01 | 0     | 0.02  | 0     | -0.02 | 0     | -0.01 | 0     | -0.01 |
| 46 | 0     | 0     | 0     | -0.01 | 0     | 0     | 0     | 0     | 0     | 0     |
| 47 | 0     | 0.01  | 0     | -0.01 | 0     | 0     | 0     | 0     | 0     | 0     |
| 48 | 0     | 0.01  | 0     | -0.01 | 0     | -0.01 | 0     | 0     | 0     | 0     |
| 49 | -0.01 | -0.01 | -0.01 | -0.01 | -0.01 | 0.02  | -0.01 | 0.01  | -0.01 | 0     |
| 50 | -0.01 | -0.02 | -0.01 | 0     | -0.01 | 0.01  | -0.01 | 0     | -0.01 | 0     |
| 51 | -0.01 | -0.04 | -0.02 | 0.02  | -0.01 | 0     | -0.01 | 0     | -0.01 | -0.01 |
| 52 | -0.01 | -0.02 | -0.01 | 0.01  | 0     | 0     | 0     | 0     | 0     | -0.01 |
| 53 | 0     | -0.02 | -0.01 | 0.01  | 0     | 0     | 0     | 0     | 0     | -0.01 |
| 54 | -0.01 | -0.01 | -0.01 | 0     | -0.01 | 0     | -0.01 | 0     | -0.01 | 0     |
| 55 | -0.03 | 0     | -0.03 | -0.02 | -0.02 | 0     | -0.02 | 0.01  | -0.02 | 0.01  |
| 56 | -0.01 | 0.03  | -0.01 | 0     | 0     | -0.01 | 0     | -0.01 | 0     | 0.01  |
| 57 | 0     | 0     | 0     | 0     | 0     | 0     | 0     | 0     | 0     | 0     |
| 58 | 0     | 0     | 0     | 0     | 0     | 0     | 0     | 0     | 0     | 0     |
| 59 | 0     | 0     | 0     | 0     | 0     | -0.01 | 0     | 0     | 0     | 0     |
| 60 | 0     | 0     | 0     | 0     | 0     | -0.01 | 0     | 0     | 0     | 0     |
| 61 | 0     | 0     | 0     | 0.01  | 0     | 0     | 0     | 0     | 0     | 0     |
| 62 | 0     | 0     | 0     | 0.01  | 0     | 0     | 0     | 0     | 0     | 0     |
| 63 | 0     | 0     | 0     | 0     | 0     | 0     | 0     | 0     | 0     | 0     |
| 64 | 0     | 0     | 0     | 0     | 0     | 0     | 0     | 0     | 0     | 0     |
| 65 | 0     | 0     | 0     | 0     | 0     | 0     | 0     | 0     | 0     | 0     |
| 66 | 0     | 0.01  | 0     | 0.01  | 0     | -0.01 | 0     | -0.01 | 0     | 0     |
| 67 | 0     | 0     | 0     | -0.01 | 0     | 0     | 0     | 0     | 0     | 0     |
| 68 | 0     | -0.01 | 0     | 0     | 0     | 0     | 0     | 0     | 0     | -0.01 |
| 69 | 0     | 0.02  | 0     | 0.01  | 0     | 0     | 0     | 0     | 0     | 0.01  |
| 70 | 0     | 0.01  | 0     | 0     | 0     | 0     | 0     | 0     | 0     | 0     |
| 71 | 0     | 0     | 0     | 0     | 0     | 0     | 0     | 0     | 0     | 0     |
| 72 | 0     | -0.03 | 0     | 0     | 0     | 0     | 0     | 0     | 0     | -0.02 |
| 73 | -0.02 | 0.02  | -0.02 | 0.01  | -0.02 | -0.02 | -0.02 | 0     | -0.02 | 0     |
| 74 | -0.02 | -0.02 | -0.03 | -0.01 | -0.02 | 0.03  | -0.03 | 0     | -0.02 | 0.01  |
| 75 | -0.17 | 0.09  | -0.27 | 0.04  | -0.18 | -0.07 | -0.29 | -0.01 | -0.16 | 0.01  |
| 76 | -0.71 | -0.39 | -0.73 | -0.15 | -0.41 | -0.14 | -1.32 | -0.25 | -0.25 | -0.22 |
| 77 | -6.84 | -2.09 | -6.24 | -1.84 | -6.21 | -2.16 | -7.84 | -2.52 | -5.15 | -2.21 |
| 78 | -4.46 | -1.53 | -2.99 | -2.36 | -3.11 | -2.83 | -3.7  | -2.9  | -3.92 | -2.37 |
| 79 | -3.32 | -0.33 | -6.35 | -0.92 | -3.73 | 0.17  | -4.71 | -1.27 | -4.33 | -2.36 |
| 80 | -0.48 | 0.01  | -0.59 | 0.17  | -0.68 | 0.19  | -0.56 | 0.19  | -0.76 | 0.67  |
| 81 | -0.12 | 0.08  | -0.14 | -0.02 | -0.16 | -0.05 | -0.14 | 0     | -0.15 | 0     |
| 82 | -0.1  | 0.04  | -0.16 | 0.01  | -0.13 | 0.03  | -0.14 | 0.02  | -0.12 | 0.05  |
| 83 | -0.01 | 0.05  | -0.01 | 0     | -0.01 | 0     | -0.01 | 0.01  | -0.01 | 0.03  |
| 84 | 0     | 0.02  | 0     | 0     | 0     | 0     | 0     | 0     | 0     | 0.01  |
| 85 | 0     | 0     | 0     | 0     | 0     | 0     | 0     | 0     | 0     | 0     |
| 86 | 0     | 0.02  | 0     | 0.01  | 0     | -0.01 | 0     | 0     | 0     | 0.01  |
| 87 | 0     | 0     | 0     | -0.01 | 0     | 0.01  | 0     | 0     | 0     | 0     |
| 88 | 0     | 0.02  | 0     | 0.01  | 0     | -0.01 | 0     | 0     | 0     | 0.01  |
| 89 | 0     | -0.01 | 0     | -0.01 | 0     | 0.01  | 0     | 0     | 0     | 0     |

|     |       |       |       |       |       |       |       |       |       |       |
|-----|-------|-------|-------|-------|-------|-------|-------|-------|-------|-------|
| 90  | 0     | 0     | 0     | 0     | 0     | 0     | 0     | 0     | 0     | 0     |
| 91  | 0     | 0.01  | 0     | 0.01  | 0     | -0.01 | 0     | -0.01 | 0     | 0     |
| 92  | 0     | -0.01 | 0     | -0.01 | 0     | 0.01  | 0     | 0.01  | 0     | -0.01 |
| 93  | 0     | 0.01  | 0     | 0     | 0     | 0     | 0     | 0     | 0     | 0     |
| 94  | 0     | 0     | 0     | 0     | 0     | 0     | 0     | 0     | 0     | 0     |
| 95  | 0     | 0.01  | 0     | 0     | 0     | 0     | 0     | -0.01 | 0     | 0     |
| 96  | 0     | 0.02  | 0     | 0.01  | 0     | -0.01 | 0     | -0.01 | 0     | 0.01  |
| 97  | 0     | 0     | 0     | 0     | 0     | 0     | 0     | 0     | 0     | 0     |
| 98  | 0     | 0.01  | 0     | 0.01  | 0     | -0.01 | 0     | -0.01 | 0     | 0.01  |
| 99  | 0     | 0     | 0     | 0     | 0     | 0     | 0     | 0     | 0     | 0     |
| 100 | 0     | 0.01  | 0     | 0.01  | 0     | -0.01 | 0     | 0     | 0     | 0     |
| 101 | 0     | 0.01  | 0     | 0     | 0     | 0     | 0     | 0     | 0     | 0.01  |
| 102 | 0     | -0.02 | 0     | -0.01 | 0     | 0     | 0     | 0     | 0     | -0.01 |
| 103 | 0     | -0.01 | 0     | 0     | 0     | 0     | 0     | 0     | 0     | 0     |
| 104 | 0     | 0.03  | 0     | 0.03  | 0     | -0.02 | 0     | -0.01 | 0     | 0.02  |
| 105 | 0     | -0.03 | 0     | -0.01 | 0     | 0.01  | 0     | 0     | 0     | -0.02 |
| 106 | -0.01 | 0.03  | -0.01 | 0.02  | -0.01 | -0.02 | -0.01 | -0.01 | -0.01 | 0.01  |
| 107 | 0     | -0.01 | -0.01 | 0     | 0     | 0     | -0.01 | 0     | 0     | -0.01 |
| 108 | 0     | -0.01 | -0.01 | 0     | 0     | 0     | 0     | 0     | 0     | 0     |
| 109 | -0.01 | -0.02 | -0.01 | 0.01  | -0.01 | -0.01 | -0.01 | -0.01 | -0.01 | -0.02 |
| 110 | 0     | 0     | 0     | 0.01  | 0     | -0.02 | 0     | -0.01 | 0     | -0.01 |
| 111 | -0.01 | -0.01 | -0.01 | -0.01 | -0.01 | 0.02  | -0.01 | 0.01  | -0.01 | 0.01  |
| 112 | -0.04 | 0.01  | -0.06 | -0.05 | -0.04 | 0     | -0.04 | 0.01  | -0.04 | 0.01  |
| 113 | -0.03 | 0.09  | -0.04 | -0.03 | -0.03 | 0.01  | -0.03 | 0.02  | -0.03 | 0.04  |
| 114 | -0.02 | -0.02 | -0.03 | -0.01 | -0.02 | 0.04  | -0.02 | 0.02  | -0.02 | 0.02  |
| 115 | -0.1  | -0.03 | -0.22 | -0.04 | -0.1  | 0.02  | -0.09 | 0.01  | -0.08 | 0.02  |
| 116 | -1.44 | -0.07 | -2.12 | -0.13 | -1.22 | -0.04 | -1.1  | -0.01 | -1.15 | -0.03 |
| 117 | -1.81 | -0.03 | -1.73 | -0.2  | -1.23 | -0.1  | -1.01 | -0.05 | -1.57 | -0.19 |
| 118 | -0.06 | -0.04 | -0.09 | 0.02  | -0.04 | 0.04  | -0.04 | 0.02  | -0.04 | 0.01  |
| 119 | -0.12 | -0.08 | -0.21 | 0.07  | -0.06 | 0.05  | -0.08 | 0     | -0.06 | 0     |
| 120 | -0.36 | 0.01  | -0.43 | 0.1   | -0.19 | -0.01 | -0.09 | -0.05 | -0.17 | -0.03 |
| 121 | -0.1  | 0.07  | -0.09 | 0.03  | -0.05 | -0.02 | -0.04 | -0.03 | -0.04 | -0.03 |
| 122 | -1.52 | 0.14  | -1.79 | 0.09  | -0.85 | -0.06 | -1.03 | 0.04  | -1.06 | -0.01 |
| 123 | -0.04 | 0.05  | -0.05 | -0.02 | -0.03 | 0     | -0.03 | 0     | -0.03 | 0.03  |
| 124 | -0.1  | 0.03  | -0.11 | -0.01 | -0.06 | 0.01  | -0.07 | 0.03  | -0.06 | 0.03  |
| 125 | -1.89 | 0.17  | -2.34 | 0.05  | -1.52 | -0.07 | -2.07 | -0.03 | -1.8  | 0.11  |
| 126 | -0.08 | -0.05 | -0.09 | -0.03 | -0.06 | 0.01  | -0.07 | 0.03  | -0.06 | -0.08 |
| 127 | -0.06 | 0.22  | -0.08 | 0.15  | -0.05 | -0.07 | -0.07 | -0.03 | -0.04 | 0.16  |
| 128 | -0.05 | 0.13  | -0.06 | 0.11  | -0.05 | -0.05 | -0.05 | -0.02 | -0.04 | 0.1   |
| 129 | -0.06 | 0.11  | -0.08 | 0.09  | -0.06 | -0.02 | -0.08 | 0.03  | -0.05 | 0.08  |
| 130 | -0.02 | -0.08 | -0.04 | -0.06 | -0.02 | 0.04  | -0.03 | 0.02  | -0.02 | -0.05 |
| 131 | -0.01 | 0     | -0.01 | -0.01 | -0.01 | 0.02  | -0.01 | 0     | -0.01 | 0.01  |
| 132 | -0.02 | 0.06  | -0.03 | 0.03  | -0.02 | 0     | -0.03 | 0.01  | -0.01 | 0.05  |
| 133 | -0.21 | 0.02  | -0.54 | -0.02 | -0.2  | 0.04  | -0.54 | 0.02  | -0.14 | 0.04  |
| 134 | -0.02 | 0.02  | -0.04 | 0.01  | -0.02 | -0.01 | -0.04 | -0.01 | -0.02 | 0.01  |



|     |       |        |       |       |       |       |       |       |       |        |
|-----|-------|--------|-------|-------|-------|-------|-------|-------|-------|--------|
| 180 | 0     | 0.01   | 0     | 0.01  | 0     | 0     | 0     | 0     | 0     | 0      |
| 181 | 0     | 0.01   | 0     | 0.01  | 0     | 0     | 0     | 0     | 0     | 0.01   |
| 182 | 0     | 0      | 0     | -0.01 | 0     | 0     | 0     | 0     | 0     | 0      |
| 183 | 0     | -0.01  | 0     | 0     | 0     | 0     | 0     | 0     | 0     | 0      |
| 184 | 0     | -0.01  | 0     | 0     | 0     | 0     | 0     | 0     | 0     | 0      |
| 185 | 0     | 0.01   | 0     | 0.01  | 0     | 0     | 0     | 0     | 0     | 0      |
| 186 | 0     | 0.02   | 0     | 0     | 0     | 0     | 0     | 0     | 0     | 0.01   |
| 187 | 0     | -0.01  | 0     | 0     | 0     | 0     | 0     | 0     | 0     | -0.01  |
| 188 | 0     | 0.01   | 0     | 0.01  | 0     | 0     | 0     | 0     | 0     | 0.01   |
| 189 | 0     | -0.02  | 0     | -0.01 | 0     | 0     | 0     | 0     | 0     | -0.01  |
| 190 | 0     | -0.01  | 0     | 0     | 0     | -0.01 | 0     | -0.01 | 0     | -0.01  |
| 191 | 0     | 0.04   | -0.01 | 0.02  | -0.01 | 0     | -0.01 | 0.01  | 0     | 0.03   |
| 192 | 0     | -0.01  | -0.01 | -0.01 | 0     | 0.01  | 0     | 0     | 0     | 0      |
| 193 | -0.03 | -0.09  | -0.06 | 0     | -0.03 | 0.01  | -0.03 | -0.02 | -0.02 | -0.03  |
| 194 | -0.01 | 0.02   | -0.01 | 0.01  | -0.01 | 0.01  | -0.01 | 0.01  | -0.01 | 0.02   |
| 195 | -0.03 | -0.03  | -0.07 | -0.07 | -0.03 | 0.02  | -0.05 | 0.02  | -0.03 | -0.04  |
| 196 | -2.06 | 0.15   | -3.37 | 0.35  | -1.78 | -0.09 | -1.53 | 0.13  | -1.45 | 0.24   |
| 197 | -0.06 | 0.04   | -0.08 | 0.04  | -0.06 | -0.03 | -0.06 | -0.02 | -0.06 | 0.03   |
| 198 | -0.03 | -0.09  | -0.06 | -0.03 | -0.04 | 0.02  | -0.04 | -0.01 | -0.04 | -0.04  |
| 199 | -0.01 | -0.01  | -0.01 | 0     | -0.01 | 0     | -0.01 | -0.01 | -0.01 | -0.01  |
| 200 | 0     | 0      | -0.01 | 0     | 0     | -0.01 | 0     | 0     | 0     | -0.01  |
| 201 | -0.01 | 0      | -0.01 | 0     | -0.01 | 0.01  | -0.01 | 0     | -0.01 | 0      |
| 202 | 0     | 0      | 0     | 0     | 0     | 0     | 0     | 0     | 0     | 0      |
| 203 | 0     | -0.01  | 0     | -0.01 | 0     | 0     | 0     | 0     | 0     | 0      |
| 204 | 0     | 0      | 0     | -0.01 | 0     | 0     | 0     | 0     | 0     | 0      |
| 205 | 0     | 0      | 0     | 0     | 0     | 0     | 0     | 0     | 0     | 0      |
| 206 | 0     | -0.01  | 0     | -0.01 | 0     | 0     | 0     | 0     | 0     | 0      |
| 207 | 0     | -0.01  | 0     | -0.01 | 0     | 0     | 0     | 0     | 0     | 0      |
| 208 | 0     | 0      | 0     | -0.01 | 0     | 0     | 0     | 0     | 0     | 0      |
| 209 | 0     | 0      | 0     | 0     | 0     | 0     | 0     | 0     | 0     | 0      |
| 210 | 0     | -0.01  | 0     | 0     | 0     | 0     | 0     | 0     | 0     | 0      |
| 211 | 0     | 0      | 0     | 0     | 0     | 0     | 0     | 0     | 0     | 0      |
| 212 | 0     | -0.02  | 0     | -0.01 | 0     | 0.01  | 0     | 0.01  | 0     | 0      |
| 213 | 0     | -0.03  | 0     | -0.02 | 0     | 0.01  | 0     | 0     | 0     | -0.01  |
| 214 | 0     | -0.01  | 0     | -0.01 | 0     | 0     | 0     | 0     | 0     | 0      |
| 215 | 0     | -0.01  | 0     | -0.01 | 0     | 0     | 0     | 0     | 0     | 0      |
| 216 | 0     | 0.01   | 0     | 0     | 0     | 0     | 0     | 0     | 0     | 0.01   |
| 217 | -0.01 | -0.01  | -0.01 | -0.01 | -0.01 | -0.01 | -0.01 | 0     | -0.01 | -0.01  |
| 218 | -0.02 | 0.06   | -0.03 | 0.04  | -0.02 | -0.01 | -0.02 | 0     | -0.02 | 0.03   |
| 219 | -0.02 | 0      | -0.04 | 0     | -0.03 | 0.04  | -0.02 | 0.03  | -0.03 | 0.02   |
| 220 | -0.78 | 0.15   | -0.93 | 0.13  | -0.98 | -0.05 | -0.59 | 0.03  | -1    | 0.09   |
| 221 | -0.09 | -0.12  | -0.11 | -0.12 | -0.1  | 0.04  | -0.08 | -0.01 | -0.13 | -0.09  |
| 222 | -0.41 | -12.61 | 0.17  | -8.2  | -0.46 | -8.42 | -0.73 | -6.79 | -1.41 | -10.75 |
| 223 | -0.47 | -0.07  | -0.47 | -0.05 | -0.34 | 0     | -0.35 | -0.04 | -0.38 | -0.07  |



|     |       |       |       |       |       |       |       |       |       |       |
|-----|-------|-------|-------|-------|-------|-------|-------|-------|-------|-------|
| 269 | 0     | 0.01  | 0     | 0.01  | 0     | 0     | 0     | 0     | 0     | 0.01  |
| 270 | 0     | 0     | 0     | 0     | 0     | 0     | 0     | 0     | 0     | 0     |
| 271 | 0     | 0     | 0     | 0     | 0     | 0     | 0     | 0     | 0     | 0     |
| 272 | 0     | 0     | 0     | 0     | 0     | 0     | 0     | 0     | 0     | 0     |
| 273 | 0     | -0.01 | 0     | -0.01 | 0     | 0     | 0     | 0     | 0     | 0     |
| 274 | 0     | -0.01 | 0     | 0     | 0     | 0     | 0     | -0.01 | 0     | -0.01 |
| 275 | 0     | -0.01 | 0     | 0     | 0     | 0     | 0     | 0     | 0     | -0.01 |
| 276 | -0.01 | 0     | 0     | -0.01 | 0     | 0     | 0     | 0     | -0.01 | 0     |
| 277 | 0     | 0.03  | 0     | 0.04  | 0     | -0.01 | 0     | 0     | 0     | 0.01  |
| 278 | 0     | 0.03  | 0     | 0.02  | 0     | -0.01 | 0     | 0     | 0     | 0.01  |
| 279 | 0     | 0.03  | 0     | 0.02  | 0     | 0     | 0     | 0     | 0     | 0.02  |
| 280 | -0.01 | 0.02  | 0     | 0.03  | 0     | 0     | 0     | 0.01  | 0     | 0.01  |
| 281 | -0.02 | 0.03  | -0.01 | 0.03  | -0.01 | -0.01 | -0.01 | -0.01 | -0.01 | 0     |
| 282 | -0.02 | -0.05 | -0.01 | -0.02 | -0.01 | 0.02  | -0.01 | 0.02  | -0.01 | -0.01 |
| 283 | -0.54 | -0.04 | -0.04 | -0.02 | -0.04 | -0.01 | -0.04 | -0.02 | -0.08 | -0.03 |
| 284 | -0.03 | 0.03  | -0.01 | 0.02  | -0.01 | 0     | -0.01 | 0.01  | -0.01 | 0.02  |
| 285 | -0.11 | -0.03 | -0.02 | -0.01 | -0.02 | 0.01  | -0.02 | 0.01  | -0.04 | -0.04 |
| 286 | -0.01 | 0.02  | 0     | 0.01  | 0     | -0.01 | 0     | 0     | -0.01 | 0.01  |
| 287 | -0.02 | 0.02  | -0.01 | 0.02  | -0.01 | 0.02  | -0.01 | 0.01  | -0.01 | -0.03 |
| 288 | 0     | 0     | 0     | 0.01  | 0     | 0     | 0     | 0     | 0     | 0     |
| 289 | 0     | 0     | 0     | 0     | 0     | 0     | 0     | 0     | 0     | -0.01 |
| 290 | 0     | 0.01  | 0     | 0     | 0     | 0     | 0     | 0     | 0     | 0.01  |
| 291 | 0     | -0.01 | 0     | -0.01 | 0     | 0.01  | 0     | 0     | 0     | -0.01 |
| 292 | -0.01 | 0.01  | 0     | 0     | -0.01 | 0.01  | 0     | 0.01  | -0.01 | 0.02  |
| 293 | -0.01 | -0.04 | 0     | -0.02 | 0     | 0     | 0     | 0     | -0.01 | -0.02 |
| 294 | -0.48 | -0.03 | -0.05 | -0.02 | -0.07 | 0.03  | -0.07 | 0.03  | -0.29 | -0.02 |
| 295 | -0.06 | 0.09  | -0.02 | 0.1   | -0.02 | -0.03 | -0.02 | -0.01 | -0.03 | 0.03  |
| 296 | -0.07 | 0.01  | -0.03 | 0.07  | -0.03 | -0.01 | -0.03 | 0     | -0.04 | 0     |
| 297 | -0.08 | -0.03 | -0.06 | 0     | -0.06 | 0.02  | -0.05 | 0.01  | -0.06 | 0.02  |
| 298 | -1.62 | -0.2  | -1.6  | 0.04  | -2.16 | 0.01  | -1.9  | -0.09 | -1.57 | -0.21 |
| 299 | -0.1  | 0.03  | -0.13 | 0.01  | -0.1  | -0.02 | -0.07 | -0.05 | -0.06 | -0.04 |
| 300 | -2.34 | -0.07 | -1.81 | 0.01  | -2.36 | -0.52 | -2.01 | -0.54 | -2.09 | -0.36 |
| 301 | -0.19 | 0.05  | -0.17 | -0.05 | -0.65 | -0.13 | -0.2  | 0.02  | -0.35 | -0.16 |
| 302 | -1.84 | -0.14 | -1.95 | -0.17 | -2.99 | -0.16 | -1.82 | -0.09 | -2.35 | -0.15 |
| 303 | -0.44 | -0.03 | -0.56 | 0.12  | -0.36 | 0.04  | -0.34 | 0.03  | -0.55 | 0.07  |
| 304 | -0.04 | 0.05  | -0.07 | -0.02 | -0.03 | 0.01  | -0.03 | 0.02  | -0.03 | 0.03  |
| 305 | -0.03 | 0     | -0.07 | 0.01  | -0.02 | -0.02 | -0.03 | -0.01 | -0.02 | -0.02 |
| 306 | -0.24 | -0.12 | -0.76 | -0.14 | -0.12 | -0.03 | -0.16 | -0.05 | -0.14 | -0.03 |
| 307 | -0.06 | -0.08 | -0.14 | -0.06 | -0.05 | 0     | -0.05 | -0.01 | -0.05 | -0.04 |
| 308 | -0.03 | -0.07 | -0.06 | -0.05 | -0.04 | 0     | -0.03 | 0     | -0.04 | -0.03 |
| 309 | -0.23 | 0.1   | -0.77 | 0.08  | -0.29 | 0.01  | -0.25 | 0.01  | -0.26 | 0.06  |
| 310 | -0.09 | -0.09 | -0.12 | -0.07 | -0.16 | 0.04  | -0.08 | -0.02 | -0.13 | -0.03 |
| 311 | -1.73 | 0.19  | -1.65 | 0.1   | -2.05 | 0.09  | -1.66 | 0.08  | -2.17 | 0.12  |
| 312 | -0.08 | -0.16 | -0.08 | -0.1  | -0.06 | 0.01  | -0.07 | -0.04 | -0.11 | -0.11 |
| 313 | -0.11 | -0.12 | -0.1  | -0.2  | -0.07 | 0.07  | -0.08 | -0.04 | -0.11 | -0.05 |



|     |       |       |       |       |       |       |       |       |       |       |
|-----|-------|-------|-------|-------|-------|-------|-------|-------|-------|-------|
| 314 | -0.39 | -0.59 | -0.25 | -0.72 | -0.18 | -0.06 | -0.16 | -0.14 | -0.2  | -0.49 |
| 315 | -0.1  | -0.1  | -0.04 | -0.1  | -0.05 | 0.01  | -0.04 | 0     | -0.05 | -0.02 |
| 316 | -0.03 | 0.02  | -0.02 | -0.02 | -0.02 | 0.03  | -0.02 | 0.01  | -0.02 | 0.03  |
| 317 | -0.04 | 0.04  | -0.03 | -0.01 | -0.03 | 0.01  | -0.03 | 0     | -0.03 | 0.03  |
| 318 | -0.01 | -0.03 | -0.01 | -0.05 | 0     | 0     | 0     | -0.01 | -0.01 | -0.02 |
| 319 | -0.01 | -0.02 | 0     | -0.03 | 0     | 0.01  | 0     | 0     | 0     | -0.01 |
| 320 | -0.01 | -0.01 | -0.01 | 0     | 0     | 0     | 0     | 0     | -0.01 | -0.01 |
| 321 | 0     | 0     | 0     | 0     | 0     | -0.01 | 0     | -0.01 | 0     | -0.01 |
| 322 | -0.01 | 0.04  | -0.01 | 0.03  | -0.01 | 0.01  | -0.01 | 0.02  | -0.01 | 0.04  |
| 323 | 0     | 0     | 0     | 0     | 0     | -0.01 | 0     | -0.01 | 0     | -0.01 |
| 324 | -0.02 | 0.01  | -0.02 | 0     | -0.02 | 0.01  | -0.02 | 0.01  | -0.02 | 0.01  |
| 325 | 0     | 0     | 0     | 0     | 0     | 0     | 0     | 0     | 0     | 0     |
| 326 | -0.01 | -0.06 | -0.01 | -0.04 | 0     | 0.02  | -0.01 | 0     | 0     | -0.04 |
| 327 | 0     | 0.01  | 0     | 0.01  | 0     | 0     | 0     | 0     | 0     | 0.01  |
| 328 | 0     | 0.02  | 0     | 0.01  | 0     | 0     | 0     | 0     | 0     | 0.01  |
| 329 | 0     | 0.07  | 0     | 0.04  | 0     | -0.01 | 0     | 0     | 0     | 0.05  |
| 330 | 0     | 0     | 0     | 0     | 0     | 0     | 0     | 0     | 0     | 0     |
| 331 | -0.01 | 0.03  | -0.01 | 0.01  | -0.01 | 0     | -0.01 | 0     | -0.01 | 0.02  |
| 332 | 0     | -0.03 | 0     | -0.01 | 0     | 0     | 0     | 0     | 0     | -0.02 |
| 333 | -0.01 | 0     | -0.01 | 0     | -0.01 | 0     | -0.01 | 0     | -0.01 | 0     |
| 334 | 0     | -0.02 | 0     | 0     | 0     | 0     | 0     | 0     | 0     | -0.01 |
| 335 | 0     | 0     | 0     | 0     | 0     | 0     | 0     | 0     | 0     | 0     |
| 336 | 0     | 0.02  | 0     | 0     | 0     | 0     | 0     | -0.01 | 0     | 0.01  |
| 337 | 0     | 0     | 0     | 0.01  | 0     | 0     | 0     | 0     | 0     | 0     |
